# Supplementary material for: PubMed-supported clinical term weighting approach for improving inter-patient similarity measure in diagnosis prediction
Source: BMC Med Inform Decis Mak. 2015 Jun 2;15:43. doi: 10.1186/s12911-015-0166-2 (PMC4450834; doi:10.1186/s12911-015-0166-2)
Supplement: Supplementary file 1 — Generic Term Weighting Computation. [file 12911_2015_166_MOESM1_ESM.xlsx]

## Sheet: Sheet1
		portal hypertension	Equal density (isodense) lesion	Hepatic fibrosis	Atrophy of liver	Splenomegaly	Hepatosplenomegaly	Large liver	Liver cyst	Nodular hyperplasia of liver	Ascites	Malignant tumor of ill-defined site	Multifocal hyperplasia	Cirrhosis liver	Venous varices	Filling defect	Thrombus	Thrombosis	Portal vein thrombosis	Steatosis of liver	Cholangiectasis	Nontraumatic hemoperitoneum	Fatty infiltration	Dysplastic nodule	Hepatic necrosis	High density lesion	Low density (not containing fat) lesion	Space occupying lesion of liver (finding)	Lobular shaped lesion	Neovascularization	Nodule of liver	Solitary necrotic liver nodule	Abnormal radiologic density, diffuse	Abnormal radiologic density, irregular	Abnormal radiologic density, nodular	Abnormal radiologic density, small area	Multiple lesions	Single lesion	Ossified nodule	HCC
		portal hypertension	Liver Isodense Lesion	Liver fibrosis	Hepatic Lobar atrophy	spleen enlargement	Hepatosplenomegaly	enlarged Liver	hepatic cyst	Liver hyperplasia	abdomen fluid	ill-defined site malignant tumor	Multifocal lesion	Cirrhosis	Varicose veins		blood clot	Thrombus formaltion	PTV	Steatosis	biliary tract dilation	Abdominal apoplexy	Fatty liver	Dysplastic hepatic nodules	hepatocellular necrosis	High radiographic density lesion	Low radiographic density lesion	SOL	Lobular lesion	Vascularization	liver nodule	liver Solitary necrotic nodule	diffuse lesion	irregular lesion	nodular lesion	small area lesion				Hepatocarcinoma
		Venous hypertension	hepatic equal dense lesion	fibrotic appearance	Hepatic atrophy	increase size spleen	spleen and liver enlargement	hepatomegaly	cystic liver	Benign hepatic lesion	peritoneum fluid		Mutiple focal lesion	Hepatic cirrhosis	Varical vessels			Thrombus development		Fatty liver	biliary tree dilation	Hemoperitoneum	Fatty liver disease	Dysplastic liver nodules	liver necrosis	hyperdense lesion	hypodense lesion	liver mass lesion	Lobular shaped lesion	Neovascularity	hepatic nodule	hepatic Solitary necrotic nodule	diffused lesion							Hepatocellular carcinoma
		Portal systemic collateral	Hepatic Isodense nodules	Irregular liver outline		enlarged spleen	increase size spleen and liver	liver hypertrophy	cystic lesion	Benign liver lesion		ill-defined site Malignant neoplasms		Cirrhotic change	Varicosity			blood clotting		Hepatic lipidosis	intrahepatic biliary tree dilation	Hematoperitoneum	Steatosis		hepatic dystrophy	high attenuating lesion	low attenuating lesion	hepatic mass lesion		blood vessels proliferation		SNN								LCC
			Liver Isodense Lesion				enlarged spleen and liver	liver enlargement		Nodular surface				liver Cirrhosis	Varices			blood clot formation		hepatic fatty change	Intrahepatic ducts dilation	Peritoneal hemorrhage	Hepatic lipidosis			hyperdensity	hypodensity													liver cell carcinoma
							spleen and liver enlargement	increase size liver		hepatic lobulation		ill-defined site cancer		CL	VVs					liver Steatosis		Spontaneous intraperitoneal hemorrhage	fatty change			High density lesion														liver carcinoma
								hepatic enlargement															liver Steatosis																	malignant hepatoma
								hepatic hypertrophy						Hepatic irregular outline						Hepatic Fatty infiltration																				hepatic cancer
														Nodular contour outline						Hepatic Fatty sparing																				liver cancer		(B or B1 or B2 or …)
														Nodular hepatic surface																										Ca Liver		(“HCC” or “Hepatocarcinoma” or “Hepatocellular carcinoma” or “LCC” or “liver cell carcinoma” or “liver carcinoma” or “malignant hepatoma” or “hepatic cancer” or “liver cancer” or “ca liver”)
feature terms at level 4 of SNOMED-CT	Count	34742003	129745007	62484002	89835009	16294009	36760000	80515008	85057007	109820009	389026000	363357005	125525009	19943007	128060009	43468004	396339007	439127006	17920008	197321007	123608004	45626005	45752008	448149008	87248009	129744006	129746008	302285008	129735005	13018008	428187007	447058001	125128004	125129007	125132005	125134006	300582001	300580009	16163002			Number of Count (A or A1 or A2 or …)	Number of Count ((A or A1 or A2 or ...) AND (B or B1 or B2 or …))	Number of Count (B or B1 or B2 or …)	Conditional Prob.
Abdominal organ finding	14			3	3	2	3	3	3	3				4					4	3					3			3			4	5										118138	13862	80926	0.117337
Atrophy of liver	1				0																																					97	5	80926	0.0515464
Blood vessel finding	3	4													4				4																							24894	1564	80926	0.0628264
Disorder of body cavity	15			2	2	2	3	2	2	2	2			3					3	2	3	3			2							4										143488	14486	80926	0.100956
Disorder of body system	16	3		4	4	4	5	4	4	4				5	5			2	3	4	5				4							6										427154	19687	80926	0.0460888
Disorder of cardiovascular system	4	2													4			1	4																							188632	2408	80926	0.0127656
Disorder of digestive system	11			3	3		4	3	3	3				4						3	4				3							5										234430	18397	80926	0.0784755
Disorder of soft tissue	4	4													3				4			2																				6076	726	80926	0.119487
Disorder of trunk	16	4		4	4	4	5	4	4	4	4			5					2	4	5	2			4							6										305571	20372	80926	0.0666686
Finding of trunk structure	18	5		5	5	5	6	5	4	5	5			6					3	5	6	3			5			6			5	7										20981	657	80926	0.031314
Liver finding	13			2	2		3	2	2	2				3					3	2					2			2			3	4										258223	19617	80926	0.0759692
Radiologic finding	9		3													3										3	3		2				3	3	3	3						9710	222	80926	0.022863
Cyst of abdomen	1								1																																	3982	70	80926	0.0175791
Mass of body region	2								4																						5											6053	1138	80926	0.188006
Mass of digestive structure	2								1																						2											6053	1138	80926	0.188006
Neoplastic disease	1											3																														108	3	80926	0.0277778
Growth alteration	3												2											2						2												144	6	80926	0.0416667
Imaging result abnormal	1															3																										1209	30	80926	0.0248139
Mechanical abnormality	1																2																									195615	2041	80926	0.0104338
Steatosis of liver	1																			0																						21753	1208	80926	0.0555326
Finding of biliary tract	1																				3																					723	31	80926	0.0428769
Hemorrhage into peritoneal cavity	1																					1																				3734	240	80926	0.0642742
Disorder of connective tissue	1																					1																				3735	240	80926	0.064257
Nontraumatic hemoperitoneum	1																					0																				3735	240	80926	0.064257
Degenerative abnormality	1																						2																			26820	1547	80926	0.0576808
Mass	2																							2															2			122	113	80926	0.92623
Traumatic and/or non-traumatic injury of anatomical site	2																								2							4										4426	110	80926	0.0248531
Abnormal radiologic density, diffuse	1																																0									3702	70	80926	0.0189087
Imaging result abnormal	4																																3	3	3	3						7201	144	80926	0.0199972
Abnormal radiologic density, irregular	1																																	0								50	1	80926	0.02
Abnormal radiologic density, nodular	1																																		0							716	31	80926	0.0432961
Abnormal radiologic density, small area	1																																			0						2820	45	80926	0.0159574
Multiple lesions	1																																				0					2767	73	80926	0.0263824
Finding of number of lesions	2																																				1	1				3575	113	80926	0.0316084
Heterotopia	1																																						3			1	0	80926	0
Degenerative abnormality	1																																						4			1	0	80926	0
																																									Min Count	1
																																									Max Count	427154
																																									Median Count	4204
																																									10th percentile	82.9
