# Supplementary material for: PubMed-supported clinical term weighting approach for improving inter-patient similarity measure in diagnosis prediction
Source: BMC Med Inform Decis Mak. 2015 Jun 2;15:43. doi: 10.1186/s12911-015-0166-2 (PMC4450834; doi:10.1186/s12911-015-0166-2)
Supplement: Supplementary file 2 — Specific Term Weighting Computation. [file 12911_2015_166_MOESM2_ESM.xlsx]

## Sheet: Sheet1
		portal hypertension	Equal density (isodense) lesion	Hepatic fibrosis	Atrophy of liver	Splenomegaly	Hepatosplenomegaly	Large liver	Liver cyst	Nodular hyperplasia of liver	Ascites	Malignant tumor of ill-defined site	Multifocal hyperplasia	Cirrhosis of liver	Venous varices	Filling defect	Thrombus	Thrombosis	Portal vein thrombosis	Steatosis of liver	Cholangiectasis	Nontraumatic hemoperitoneum	Fatty infiltration	Dysplastic nodule	Hepatic necrosis	High density lesion	Low density (not containing fat) lesion	Space occupying lesion of liver (finding)	Lobular shaped lesion	Neovascularization	Nodule of liver	Solitary necrotic liver nodule	Abnormal radiologic density, diffuse	Abnormal radiologic density, irregular	Abnormal radiologic density, nodular	Abnormal radiologic density, small area	Multiple lesions	Single lesion	Ossified nodule	HCC			(B or B1 or B2 or …)
		portal hypertension	Liver Isodense Lesion	Liver fibrosis	Hepatic Lobar atrophy	spleen enlargement	Hepatosplenomegaly	enlarged Liver	hepatic cyst	Liver hyperplasia	abdomen fluid	ill-defined site malignant tumor	Multifocal lesion	Cirrhosis	Varicose veins		blood clot	Thrombus formaltion		Steatosis	biliary tract dilation	Abdominal apoplexy	Fatty liver	Dysplastic hepatic nodules	hepatocellular necrosis	High radiographic density lesion	Low radiographic density lesion	liver mass lesion	Lobular lesion	Vascularization	liver nodule	liver Solitary necrotic nodule	diffuse lesion	irregular lesion	nodular lesion	small area lesion				Hepatocarcinoma			(“HCC” or “Hepatocarcinoma” or “Hepatocellular carcinoma” or “LCC” or “liver cell carcinoma” or “liver carcinoma” or “malignant hepatoma” or “hepatic cancer” or “liver cancer” or “ca liver”)
		Venous hypertension	hepatic equal dense lesion	fibrotic appearance	Hepatic atrophy	increase size spleen	spleen and liver enlargement	hepatomegaly	cystic liver	Benign hepatic lesion	peritoneum fluid		Mutiple focal lesion	Hepatic cirrhosis	Varical vessels			Thrombus development		Fatty liver	biliary tree dilation	Hemoperitoneum	Fatty liver disease	Dysplastic liver nodules	liver necrosis	hyperdense lesion	hypodense lesion	hepatic mass lesion	Lobular shaped lesion	Neovascularity	hepatic nodule	hepatic Solitary necrotic nodule	diffused lesion							Hepatocellular carcinoma
		Portal systemic collateral	Hepatic Isodense nodules	Irregular liver outline		enlarged spleen	increase size spleen and liver	liver hypertrophy	cystic lesion	Benign liver lesion		ill-defined site Malignant neoplasms		Cirrhotic change	Varicosity			blood clotting		Hepatic lipidosis	intrahepatic biliary tree dilation	Hematoperitoneum	Steatosis		hepatic dystrophy	high attenuating lesion	low attenuating lesion			blood vessels proliferation										LCC			Count	80926
			Liver Isodense Lesion				increase size spleen and liver	liver enlargement		Nodular surface				liver Cirrhosis	Varices			blood clot formation		hepatic fatty change	Intrahepatic ducts dilation	Peritoneal hemorrhage	Hepatic lipidosis			hyperdensity	hypodensity													liver cell carcinoma
							spleen and liver enlargement	increase size liver		hepatic lobulation		ill-defined site cancer		Hepatic irregular outline						liver Steatosis		Spontaneous intraperitoneal hemorrhage	fatty change			High density lesion														liver carcinoma
								hepatic enlargement						Nodular contour outline OR Nodular hepatic surface						Hepatic Fatty infiltration			liver Steatosis																	malignant hepatoma
								hepatic hypertrophy												Hepatic Fatty sparing																				hepatic cancer
Count (C or C1 OR C2 OR ….)		20519	32	11296	97	18787	6442	18220	3639	2611	45621	108	48	95359	27548	1209	27029	195708	2350	21788	723	3736	26853	121	4185	494	974	1533	33	67804	2092	54	3728	63	723	2823	2768	947	1	liver cancer			Min Count	1
Count ((C or C1 OR C2 OR ….) AND (B or B1 or B2 or …))		657	14	923	5	144	51	930	62	858	1886	3	3	16188	655	30	727	2042	490	1210	31	240	1548	113	95	17	36	268	0	1096	1074	14	70	2	31	45	73	47	0	Ca Liver			Max Count	195708
conditional probability		0.0320191	0.4375	0.0817103	0.0515464	0.00766487	0.0079168	0.0510428	0.0170376	0.32861	0.0413406	0.0277778	0.0625	0.169758	0.0237767	0.0248139	0.026897	0.0104339	0.208511	0.0555352	0.0428769	0.0642398	0.0576472	0.933884	0.0227001	0.034413	0.036961	0.174821	0	0.0161642	0.513384	0.259259	0.0187768	0.031746	0.0428769	0.0159405	0.0263728	0.0496304	0				Median Count	2689.5
feature terms at level 4 of SNOMED-CT	Count	34742003	129745007	62484002	89835009	16294009	36760000	80515008	85057007	109820009	389026000	363357005	125525009	19943007	128060009	43468004	396339007	439127006	17920008	197321007	123608004	45626005	45752008	448149008	87248009	129744006	129746008	302285008	129735005	13018008	428187007	447058001	125128004	125129007	125132005	125134006	300582001	300580009	16163002				10th percentile	46.5
Abdominal organ finding	14			0.0817103	0.0515464	0.00766487	0.0079168	0.0510428	0.0170376	0.32861				0.169758					0.208511	0.0555352					0.0227001			0.174821			0.513384	0.259259
Atrophy of liver	1				0.0515464
Blood vessel finding	3	0.0320191													0.0237767				0.208511
Disorder of body cavity	15			0.0817103	0.0515464	0.00766487	0.0079168	0.0510428	0.0170376	0.32861	0.0413406			0.169758					0.208511	0.0555352	0.0428769	0.0642398			0.0227001							0.259259
Disorder of body system	16	0.0320191		0.0817103	0.0515464	0.00766487	0.0079168	0.0510428	0.0170376	0.32861				0.169758	0.0237767			0.0104339	0.208511	0.0555352	0.0428769				0.0227001							0.259259
Disorder of cardiovascular system	4	0.0320191													0.0237767			0.0104339	0.208511
Disorder of digestive system	11			0.0817103	0.0515464		0.0079168	0.0510428	0.0170376	0.32861				0.169758						0.0555352	0.0428769				0.0227001							0.259259
Disorder of soft tissue	4	0.0320191													0.0237767				0.208511			0.0642398
Disorder of trunk	16	0.0320191		0.0817103	0.0515464	0.00766487	0.0079168	0.0510428	0.0170376	0.32861	0.0413406			0.169758					0.208511	0.0555352	0.0428769	0.0642398			0.0227001							0.259259
Finding of trunk structure	17			0.0817103	0.0515464	0.00766487	0.0079168	0.0510428	0.0170376	0.32861	0.0413406			0.169758					0.208511	0.0555352	0.0428769	0.0642398			0.0227001			0.174821			0.513384	0.259259
Liver finding	13			0.0817103	0.0515464		0.0079168	0.0510428	0.0170376	0.32861				0.169758					0.208511	0.0555352					0.0227001			0.174821			0.513384	0.259259
Radiologic finding	9		0.4375													0.0248139										0.034413	0.036961		0				0.0187768	0.031746	0.0428769	0.0159405
Cyst of abdomen	1								0.0170376
Mass of body region	2								0.0170376																						0.513384
Mass of digestive structure	2								0.0170376																						0.513384
Neoplastic disease	1											0.0277778
Growth alteration	3												0.0625											0.933884						0.0161642
Imaging result abnormal	1															0.0248139
Mechanical abnormality	1																0.026897
Steatosis of liver	1																			0.0555352
Finding of biliary tract	1																				0.0428769
Hemorrhage into peritoneal cavity	1																					0.0642398
Disorder of connective tissue	1																					0.0642398
Nontraumatic hemoperitoneum	1																					0.0642398
Degenerative abnormality	1																						0.0576472
Mass	2																							0.933884															0
Traumatic and/or non-traumatic injury of anatomical site	2																								0.0227001							0.259259
Abnormal radiologic density, diffuse	1																																0.0187768
Imaging result abnormal	4																																0.0187768	0.031746	0.0428769	0.0159405
Abnormal radiologic density, irregular	1																																	0.031746
Abnormal radiologic density, nodular	1																																		0.0428769
Abnormal radiologic density, small area	1																																			0.0159405
Multiple lesions	1																																				0.0263728
Finding of number of lesions	2																																				0.0263728	0.0496304
Heterotopia	1																																						0
Degenerative abnormality	1																																						0
