# Supplementary material for: PubMed-supported clinical term weighting approach for improving inter-patient similarity measure in diagnosis prediction
Source: BMC Med Inform Decis Mak. 2015 Jun 2;15:43. doi: 10.1186/s12911-015-0166-2 (PMC4450834; doi:10.1186/s12911-015-0166-2)
Supplement: Supplementary file 3 — Similarity Scores with Generic Term Weighting. [file 12911_2015_166_MOESM3_ESM.xlsx]

## Sheet: all pairs of + and + reports
ALL POSITIVE REPORTS
feature terms at level 4 of SNOMED-CT
Case ID	T93	PW22	PW13	T138	T130	UC14	T80	T24A	T154	T36	T67	T39	T146	UC03	R07	T74	T108	T135	T124	T148	T147	T155	PW08	PW02	T13B	T33	PW14	PW19	CIR15	UC21	UC04	R13B	UC06	UC17	UC13	R26	PM32	R5	PM26	UC24	PW24	R19B	PM24	T69	T152	T149	T11B	PW18	T141
?/HCC	(+)	(+)	(+)	(+)	(+)	(+)	highly suggestive	(+)	(+)	(+)	(+)	(+)	(+)	(+)	(+)	(+)	(+)	(+)	(+)	(+)	(+)	(+)	(+)	(+)	(+)	(+)	(+)	(+)	(+)	(+)	(+)	(+)	(+)	(+)	(+)	(+)	(+)	(+)	(+)	(+)	(+)	(+)	(+)	(+)	(+)	(+)	(+)	(+)	(+)
Abdominal organ finding	0.0856364	0.114182	0	0	0	0	0	0	0	0.0856364	0.0685091	0	0	0.114182	0.0685091	0	0.0856364	0	0	0.0685091	0.0685091	0	0	0	0	0	0.114182	0	0.114182	0.0856364	0.114182	0.0856364	0.114182	0.114182	0.114182	0.0856364	0.114182	0.0856364	0.0685091	0.114182	0.114182	0.114182	0.114182	0	0.0856364	0	0.114182	0	0
Atrophy of liver	0	0	0	0	0	0	0	0	0	0	0	0	0	0	0	0	0	0	0	0	0	0	0	0	0	0	0	0	0	0	0	0	0	0	0	0	0	0	0	0	0	0	0	0	0	0	0	0	0
Blood vessel finding	0	0	0	0	0	0	0	0	0	0	0	0	0	0	0	0	0	0	0	0	0.0501304	0	0	0	0	0	0	0	0	0	0.0501304	0	0.0501304	0.0501304	0.0501304	0	0	0.0501304	0	0.0501304	0.0501304	0	0.0501304	0	0	0	0.0501304	0.0501304	0
Disorder of body cavity	0.105912	0.105912	0	0	0	0	0	0	0	0.105912	0	0.105912	0	0.105912	0.079434	0	0.105912	0.105912	0	0.105912	0.079434	0	0	0	0	0.079434	0.105912	0	0.105912	0.105912	0.105912	0.105912	0.105912	0.105912	0.105912	0.105912	0.105912	0.105912	0.079434	0.105912	0.105912	0.105912	0.105912	0.079434	0.105912	0	0.105912	0	0.105912
Disorder of body system	0.0429366	0.0429366	0	0	0	0	0	0	0	0.0429366	0	0	0	0.0429366	0.0357805	0	0.0429366	0	0	0	0.0536707	0	0	0	0	0.0357805	0.0429366	0	0.0429366	0.0429366	0.0536707	0.0429366	0.0536707	0.0536707	0.0536707	0.0429366	0.0429366	0.0429366	0	0.0536707	0.0536707	0.0429366	0.0536707	0.0357805	0.0429366	0	0.0536707	0.0536707	0
Disorder of cardiovascular system	0	0	0	0	0	0	0	0	0	0	0	0	0	0	0	0	0	0	0	0	0.022597	0	0	0	0	0	0	0	0	0	0.0376616	0	0.0376616	0.022597	0.0376616	0	0	0.022597	0	0.0376616	0.0376616	0	0.0376616	0	0	0	0.022597	0.0376616	0
Disorder of digestive system	0.0700337	0	0	0	0	0	0	0	0	0.0700337	0	0	0	0.0700337	0.0560269	0	0.0700337	0	0	0	0	0	0	0	0	0.0560269	0	0	0.0560269	0.0700337	0.0560269	0.0700337	0.0700337	0.0700337	0.0700337	0.0700337	0.0700337	0.0700337	0	0.0700337	0.0560269	0.0700337	0.0560269	0.0560269	0.0700337	0	0	0	0
Disorder of soft tissue	0	0	0	0	0	0	0	0	0	0	0	0	0	0	0	0	0	0	0	0	0.0691336	0	0	0	0	0	0	0	0	0	0.086417	0	0.086417	0.0691336	0.086417	0	0	0.086417	0.115223	0.086417	0.086417	0	0.0691336	0	0	0	0.0691336	0.0691336	0
Disorder of trunk	0.0516405	0.0516405	0	0	0	0	0	0	0	0.0516405	0	0.0516405	0	0.0516405	0.0430338	0	0.0516405	0.0516405	0	0.0516405	0.0860676	0	0	0	0	0.0430338	0.0516405	0	0.0516405	0.0516405	0.0516405	0.0516405	0.0860676	0.0860676	0.0516405	0.0516405	0.0516405	0.0516405	0.0860676	0.0516405	0.0516405	0.0516405	0.0516405	0.0430338	0.0516405	0	0.0860676	0.0516405	0.0516405
Finding of trunk structure	0.029493	0.029493	0	0	0	0	0	0	0	0.0353916	0.029493	0.029493	0	0.029493	0.0252797	0	0.0353916	0.029493	0	0.029493	0.0442394	0	0	0	0	0.0252797	0.029493	0	0.029493	0.0353916	0.029493	0.029493	0.0442394	0.0442394	0.029493	0.0353916	0.029493	0.029493	0.0442394	0.029493	0.029493	0.0353916	0.029493	0.0252797	0.029493	0	0.0442394	0.029493	0.029493
Liver finding	0.091875	0	0	0	0	0	0	0	0	0.091875	0.0689063	0	0	0.091875	0.0689063	0	0.091875	0	0	0.0689063	0.0689063	0	0	0	0	0	0	0	0.0689063	0.091875	0.0689063	0.091875	0.091875	0.091875	0.091875	0.091875	0.091875	0.091875	0.0689063	0.091875	0.0689063	0.091875	0.0689063	0	0.091875	0	0.0689063	0	0
Radiologic finding	0.0378013	0	0.0378013	0.0378013	0	0.0378013	0.0378013	0.0378013	0.0378013	0	0	0.0378013	0.0378013	0	0	0.0378013	0.0378013	0.0378013	0	0.0378013	0.0378013	0.0378013	0	0	0.0378013	0.0378013	0.0378013	0.0378013	0	0.0378013	0.0378013	0.0378013	0.0378013	0.0378013	0.0378013	0.0378013	0.0378013	0	0	0.0378013	0	0.0378013	0	0.0378013	0.0378013	0	0	0	0.0378013
Cyst of abdomen	0	0	0	0	0	0	0	0	0	0.0662931	0	0	0	0	0	0	0.0662931	0	0	0	0	0	0	0	0	0	0	0	0	0.0662931	0	0	0	0.0662931	0	0.0662931	0	0	0	0	0	0.0662931	0	0	0	0	0	0	0
Mass of body region	0	0	0	0	0	0	0	0	0	0.0867193	0.0722661	0	0	0	0	0	0.0867193	0	0	0.0722661	0	0	0	0	0	0	0	0	0	0.0867193	0.0722661	0	0.0722661	0.0867193	0	0.0867193	0	0.0722661	0.0722661	0	0	0.0867193	0	0	0	0	0	0	0
Mass of digestive structure	0	0	0	0	0	0	0	0	0	0.216798	0.144532	0	0	0	0	0	0.216798	0	0	0.144532	0	0	0	0	0	0	0	0	0	0.216798	0.144532	0	0.144532	0.216798	0	0.216798	0	0.144532	0.144532	0	0	0.216798	0	0	0	0	0	0	0
Neoplastic disease	0	0	0	0	0	0	0	0	0	0	0	0	0	0	0	0	0	0	0	0	0	0	0	0	0	0	0	0	0	0	0	0	0	0	0	0	0	0	0	0.0416667	0	0.0416667	0	0.0416667	0	0	0	0	0
Growth alteration	0	0	0	0	0	0.0680414	0	0	0	0	0.0680414	0	0	0	0	0	0	0	0	0.0680414	0	0	0	0	0	0	0	0	0	0	0	0	0	0	0	0	0	0	0.0680414	0	0	0	0.0680414	0	0	0.0680414	0	0	0
Imaging result abnormal	0	0	0	0	0	0	0	0	0	0	0	0	0	0	0	0	0.0393811	0	0	0	0	0	0	0	0	0	0	0	0	0	0	0	0.0393811	0	0.0393811	0	0.0393811	0	0	0.0393811	0	0	0	0	0	0	0	0	0
Mechanical abnormality	0	0	0	0	0	0	0	0	0	0	0	0	0	0	0	0	0	0	0	0	0	0	0	0	0	0	0	0	0	0	0	0	0.0340486	0	0	0	0.0340486	0	0	0.0340486	0	0	0	0.0340486	0	0	0	0	0
Steatosis of liver	0	0	0	0	0	0	0	0	0	0	0	0	0	0	0	0	0	0	0	0	0	0	0	0	0	0	0	0	0	0	0	0	0	0	0	0	0	0	0	0	0	0	0	0	0	0	0	0	0
Finding of biliary tract	0	0	0	0	0	0	0	0	0	0	0	0	0	0	0	0	0	0	0	0	0	0	0	0	0	0.0517668	0	0	0.0517668	0	0	0	0	0	0	0	0	0	0	0	0	0	0	0.0517668	0	0	0	0	0
Hemorrhage into peritoneal cavity	0	0	0	0	0	0	0	0	0	0	0	0	0	0	0	0	0	0	0	0	0	0	0	0	0	0	0	0	0	0	0	0	0	0	0	0	0	0	0.126762	0	0	0	0	0.253524	0	0	0	0	0
Disorder of connective tissue	0	0	0	0	0	0	0	0	0	0	0	0	0	0	0	0	0	0	0	0	0	0	0	0	0	0	0	0	0	0	0	0	0	0	0	0	0	0	0.126745	0	0	0	0	0.25349	0	0	0	0	0
Nontraumatic hemoperitoneum	0	0	0	0	0	0	0	0	0	0	0	0	0	0	0	0	0	0	0	0	0	0	0	0	0	0	0	0	0	0	0	0	0	0	0	0	0	0	0.25349	0	0	0	0	0.25349	0	0	0	0	0
Degenerative abnormality	0	0	0	0	0	0	0	0	0	0	0	0	0	0	0	0	0	0	0	0	0	0	0	0	0	0	0	0	0	0	0	0	0	0	0	0	0	0	0	0	0	0	0	0.240168	0	0	0	0	0
Mass	0	0	0	0	0	0	0	0	0	0	0	0	0	0	0	0	0	0	0	0	0	0	0	0	0	0	0	0	0	0	0	0	0	0	0	0	0	0	0	0	0	0	0	0.962408	0	0	0	0	0
Traumatic and/or non-traumatic injury of anatomical site	0	0	0	0	0	0	0	0	0	0	0	0	0	0.0525496	0	0	0	0	0	0	0	0	0	0	0	0	0	0	0	0	0	0	0	0	0	0	0	0	0	0	0	0	0	0.157649	0.0525496	0	0	0	0
Abnormal radiologic density, diffuse	0	0	0	0	0	0	0	0	0	0	0	0	0	0	0	0.137509	0	0	0	0	0	0	0	0	0	0	0	0	0	0	0	0	0.137509	0	0	0	0	0	0	0	0	0	0	0.137509	0	0	0	0	0
Imaging result abnormal	0	0	0	0.0353529	0	0.0353529	0	0	0	0	0	0.0353529	0	0	0	0.0353529	0	0	0	0	0	0	0	0	0	0	0	0	0	0	0	0	0.0353529	0	0	0	0	0	0	0	0	0	0	0.141412	0	0	0	0	0
Abnormal radiologic density, irregular	0	0	0	0	0	0	0	0	0	0	0	0.141421	0	0	0	0	0	0	0	0	0	0	0	0	0	0	0	0	0	0	0	0	0	0	0	0	0	0	0	0	0	0	0	0.141421	0	0	0	0	0
Abnormal radiologic density, nodular	0	0	0	0	0	0.208077	0	0	0	0	0	0	0	0	0	0.208077	0	0	0	0	0	0	0	0	0	0	0	0	0	0	0	0	0	0	0	0	0	0	0	0	0	0	0	0.208077	0	0	0	0	0
Abnormal radiologic density, small area	0	0	0	0	0	0	0	0	0	0	0	0	0	0	0	0.126323	0	0	0	0	0	0	0	0	0	0	0	0	0	0	0	0	0	0	0	0	0	0	0	0	0	0	0	0.126323	0	0	0	0	0
Multiple lesions	0	0	0	0	0	0	0	0	0	0	0	0	0	0	0	0.162426	0	0	0	0	0	0	0	0	0	0	0	0	0	0	0	0	0.162426	0	0	0	0	0	0.162426	0	0	0	0	0.162426	0	0	0	0	0
Finding of number of lesions	0	0	0	0	0	0	0	0	0	0	0	0	0	0	0	0.0888937	0	0	0	0	0	0	0.0888937	0	0	0	0	0	0	0	0.0888937	0.0888937	0.0888937	0	0	0	0.0888937	0	0.0888937	0	0	0	0	0.177787	0	0	0.0888937	0	0
Heterotopia	0	0	0	0	0	0	0	0	0	0	0	0	0	0	0	0	0	0	0	0	0	0	0	0	0	0	0	0	0	0	0	0	0	0	0	0	0	0	0	0	0	0	0	0	0	0	0	0	0
Degenerative abnormality	0	0	0	0	0	0	0	0	0	0	0	0	0	0	0	0	0	0	0	0	0	0	0	0	0	0	0	0	0	0	0	0	0	0	0	0	0	0	0	0	0	0	0	0	0	0	0	0	0
constant	1e-08	1e-05	0.1	0.01	1	0.0001	0.1	0.1	0.1	1e-10	1e-06	1e-06	0.1	1e-08	1e-07	1e-07	1e-12	0.0001	1	1e-09	1e-10	0.1	0.1	1	0.1	1e-07	1e-06	0.1	1e-08	1e-11	1e-14	1e-09	1e-19	1e-14	1e-12	1e-11	1e-11	1e-12	1e-14	1e-14	1e-10	1e-12	1e-11	1e-22	1e-09	0.1	1e-10	1e-06	0.0001
	0	0	0	0	0	0	0	0	0	0	0	0	0	0	0	0	0	0	0	0	0	0	0	0	0	0	0	0	0	0	0	0	0	0	0	0	0	0	0	0	0	0	0	0	0	0	0	0	0
	0	0	0	0	0	0	0	0	0	0	0	0	0	0	0	0	0	0	0	0	0	0	0	0	0	0	0	0	0	0	0	0	0	0	0	0	0	0	0	0	0	0	0	0	0	0	0	0	0
	0	0	0	0	0	0	0	0	0	0	0	0	0	0	0	0	0	0	0	0	0	0	0	0	0	0	0	0	0	0	0	0	0	0	0	0	0	0	0	0	0	0	0	0	0	0	0	0	0
	0	0	0	0	0	0	0	0	0	0	0	0	0	0	0	0	0	0	0	0	0	0	0	0	0	0	0	0	0	0	0	0	0	0	0	0	0	0	0	0	0	0	0	0	0	0	0	0	0
	0	0	0	0	0	0	0	0	0	0	0	0	0	0	0	0	0	0	0	0	0	0	0	0	0	0	0	0	0	0	0	0	0	0	0	0	0	0	0	0	0	0	0	0	0	0	0	0	0
	0	0	0	0	0	0	0	0	0	0	0	0	0	0	0	0	0	0	0	0	0	0	0	0	0	0	0	0	0	0	0	0	0	0	0	0	0	0	0	0	0	0	0	0	0	0	0	0	0
	0	0	0	0	0	0	0	0	0	0	0	0	0	0	0	0	0	0	0	0	0	0	0	0	0	0	0	0	0	0	0	0	0	0	0	0	0	0	0	0	0	0	0	0	0	0	0	0	0
	0	0	0	0	0	0	0	0	0	0	0	0	0	0	0	0	0	0	0	0	0	0	0	0	0	0	0	0	0	0	0	0	0	0	0	0	0	0	0	0	0	0	0	0	0	0	0	0	0
	0	0	0	0	0	0	0	0	0	0	0	0	0	0	0	0	0	0	0	0	0	0	0	0	0	0	0	0	0	0	0	0	0	0	0	0	0	0	0	0	0	0	0	0	0	0	0	0	0
	0	0	0	0	0	0	0	0	0	0	0	0	0	0	0	0	0	0	0	0	0	0	0	0	0	0	0	0	0	0	0	0	0	0	0	0	0	0	0	0	0	0	0	0	0	0	0	0	0
	0	0	0	0	0	0	0	0	0	0	0	0	0	0	0	0	0	0	0	0	0	0	0	0	0	0	0	0	0	0	0	0	0	0	0	0	0	0	0	0	0	0	0	0	0	0	0	0	0
	0	0	0	0	0	0	0	0	0	0	0	0	0	0	0	0	0	0	0	0	0	0	0	0	0	0	0	0	0	0	0	0	0	0	0	0	0	0	0	0	0	0	0	0	0	0	0	0	0
	0	0	0	0	0	0	0	0	0	0	0	0	0	0	0	0	0	0	0	0	0	0	0	0	0	0	0	0	0	0	0	0	0	0	0	0	0	0	0	0	0	0	0	0	0	0	0	0	0
	0	0	0	0	0	0	0	0	0	0	0	0	0	0	0	0	0	0	0	0	0	0	0	0	0	0	0	0	0	0	0	0	0	0	0	0	0	0	0	0	0	0	0	0	0	0	0	0	0
	0	0	0	0	0	0	0	0	0	0	0	0	0	0	0	0	0	0	0	0	0	0	0	0	0	0	0	0	0	0	0	0	0	0	0	0	0	0	0	0	0	0	0	0	0	0	0	0	0
	0	0	0	0	0	0	0	0	0	0	0	0	0	0	0	0	0	0	0	0	0	0	0	0	0	0	0	0	0	0	0	0	0	0	0	0	0	0	0	0	0	0	0	0	0	0	0	0	0
	0	0	0	0	0	0	0	0	0	0	0	0	0	0	0	0	0	0	0	0	0	0	0	0	0	0	0	0	0	0	0	0	0	0	0	0	0	0	0	0	0	0	0	0	0	0	0	0	0
	0	0	0	0	0	0	0	0	0	0	0	0	0	0	0	0	0	0	0	0	0	0	0	0	0	0	0	0	0	0	0	0	0	0	0	0	0	0	0	0	0	0	0	0	0	0	0	0	0
	0	0	0	0	0	0	0	0	0	0	0	0	0	0	0	0	0	0	0	0	0	0	0	0	0	0	0	0	0	0	0	0	0	0	0	0	0	0	0	0	0	0	0	0	0	0	0	0	0
	0	0	0	0	0	0	0	0	0	0	0	0	0	0	0	0	0	0	0	0	0	0	0	0	0	0	0	0	0	0	0	0	0	0	0	0	0	0	0	0	0	0	0	0	0	0	0	0	0
	0	0	0	0	0	0	0	0	0	0	0	0	0	0	0	0	0	0	0	0	0	0	0	0	0	0	0	0	0	0	0	0	0	0	0	0	0	0	0	0	0	0	0	0	0	0	0	0	0
	0	0	0	0	0	0	0	0	0	0	0	0	0	0	0	0	0	0	0	0	0	0	0	0	0	0	0	0	0	0	0	0	0	0	0	0	0	0	0	0	0	0	0	0	0	0	0	0	0
magnitude of vector (vector length)	0.196738	0.172148	0.106906	0.052714	1	0.224954	0.106906	0.106906	0.106906	0.310767	0.202615	0.193475	0.106906	0.213874	0.150538	0.339301	0.315525	0.127212	1	0.237415	0.192947	0.106906	0.133799	1	0.106906	0.131639	0.17625	0.106906	0.200504	0.313057	0.292235	0.215889	0.38202	0.343503	0.241654	0.313057	0.234568	0.271809	0.446999	0.247573	0.223514	0.324723	0.227815	1.18234	0.203635	0.120953	0.238649	0.122996	0.127212
similarity score	T93	PW22	PW13	T138	T130	UC14	T80	T24A	T154	T36	T67	T39	T146	UC03	R07	T74	T108	T135	T124	T148	T147	T155	PW08	PW02	T13B	T33	PW14	PW19	CIR15	UC21	UC04	R13B	UC06	UC17	UC13	R26	PM32	R5	PM26	UC24	PW24	R19B	PM24	T69	T152	T149	T11B	PW18	T141
T93		0.778776	0.0679397	0.137784	5.08291e-08	0.0322873	0.0679397	0.0679397	0.0679397	0.612546	0.327817	0.42515	0.0679397	0.944013	0.980489	0.0214062	0.626328	0.646606	5.08291e-08	0.607608	0.792764	0.0679397	3.79892e-08	5.08291e-08	0.0679397	0.705447	0.801862	0.0679397	0.928598	0.631264	0.669986	0.911293	0.583092	0.648474	0.87524	0.631264	0.891697	0.697086	0.299744	0.854317	0.843484	0.646851	0.827559	0.0785427	0.966129	4.20238e-08	0.753547	0.241385	0.646606
PW22			5.43369e-05	1.10198e-05	5.80895e-05	2.58228e-08	5.43369e-05	5.43369e-05	5.43369e-05	0.496273	0.249208	0.442976	5.43369e-05	0.804904	0.800303	1.71203e-11	0.488789	0.673717	5.80895e-05	0.552388	0.731262	5.43369e-05	4.34156e-05	5.80895e-05	5.43369e-05	0.570009	0.976729	5.43369e-05	0.858577	0.492642	0.598235	0.709693	0.491281	0.546368	0.723452	0.492642	0.733896	0.563684	0.285703	0.706157	0.782168	0.53325	0.767401	0.0634633	0.752398	4.80265e-05	0.786422	0.275864	0.673717
PW13				0.43101	0.935399	0.0598336	1	1	1	3.00997e-10	4.61663e-06	0.0690901	1	4.3736e-08	6.21373e-07	0.0393938	0.0423621	0.105806	0.935399	0.0562992	0.0692742	1	0.699109	0.935399	1	0.101538	0.0758426	1	4.66524e-08	0.042696	0.0457381	0.0619129	0.0349885	0.0389117	0.0553116	0.042696	0.0569827	3.44138e-12	2.09262e-14	0.0539893	4.18497e-10	0.0411621	4.10596e-11	0.011305	0.0656385	0.773358	3.91956e-10	7.60511e-06	0.105806
T138					0.189703	0.225983	0.43101	0.43101	0.43101	6.10435e-11	9.36271e-07	0.262654	0.43101	8.86984e-09	1.26017e-07	0.149769	0.0859121	0.213238	0.189703	0.114177	0.140491	0.43101	0.141782	0.189703	0.43101	0.205923	0.153802	0.43101	9.4613e-09	0.0865892	0.0927588	0.125562	0.133022	0.0789145	0.112174	0.0865892	0.115563	6.97926e-13	4.24392e-15	0.109493	8.4873e-11	0.0834785	8.32707e-12	0.103139	0.133118	0.15684	7.94903e-11	1.54235e-06	0.213238
T130						0.000444534	0.935399	0.935399	0.935399	3.21785e-10	4.93546e-06	5.16862e-06	0.935399	4.67565e-08	6.64286e-07	2.94723e-07	3.16932e-12	0.00078609	1	4.21203e-09	5.18276e-10	0.935399	0.747391	1	0.935399	7.59655e-07	5.67377e-06	0.935399	4.98743e-08	3.1943e-11	3.4219e-14	4.63202e-09	2.61766e-19	2.91118e-14	4.13814e-12	3.1943e-11	4.26316e-11	3.67905e-12	2.23714e-14	4.03922e-14	4.474e-10	3.07955e-12	4.38953e-11	8.45781e-23	4.91075e-09	0.826767	4.19025e-10	8.13034e-06	0.00078609
UC14							0.0598336	0.0598336	0.0598336	1.43044e-13	0.101573	0.0615481	0.0598336	2.07849e-11	2.95298e-10	0.602338	0.0201319	0.0499338	0.000444534	0.11344	0.0329215	0.0598336	0.000332241	0.000444534	0.0598336	0.0482543	0.0360405	0.0598336	2.21708e-11	0.0202906	0.0217364	0.0294232	0.0311712	0.0184922	0.026286	0.0202906	0.0270802	1.63546e-15	0.046041	0.0256576	1.98885e-13	0.0195617	0.0903378	0.186953	0.0311937	0.170519	1.86271e-13	3.61422e-09	0.0499338
T80								1	1	3.00997e-10	4.61663e-06	0.0690901	1	4.3736e-08	6.21373e-07	0.0393938	0.0423621	0.105806	0.935399	0.0562992	0.0692742	1	0.699109	0.935399	1	0.101538	0.0758426	1	4.66524e-08	0.042696	0.0457381	0.0619129	0.0349885	0.0389117	0.0553116	0.042696	0.0569827	3.44138e-12	2.09262e-14	0.0539893	4.18497e-10	0.0411621	4.10596e-11	0.011305	0.0656385	0.773358	3.91956e-10	7.60511e-06	0.105806
T24A									1	3.00997e-10	4.61663e-06	0.0690901	1	4.3736e-08	6.21373e-07	0.0393938	0.0423621	0.105806	0.935399	0.0562992	0.0692742	1	0.699109	0.935399	1	0.101538	0.0758426	1	4.66524e-08	0.042696	0.0457381	0.0619129	0.0349885	0.0389117	0.0553116	0.042696	0.0569827	3.44138e-12	2.09262e-14	0.0539893	4.18497e-10	0.0411621	4.10596e-11	0.011305	0.0656385	0.773358	3.91956e-10	7.60511e-06	0.105806
T154										3.00997e-10	4.61663e-06	0.0690901	1	4.3736e-08	6.21373e-07	0.0393938	0.0423621	0.105806	0.935399	0.0562992	0.0692742	1	0.699109	0.935399	1	0.101538	0.0758426	1	4.66524e-08	0.042696	0.0457381	0.0619129	0.0349885	0.0389117	0.0553116	0.042696	0.0569827	3.44138e-12	2.09262e-14	0.0539893	4.18497e-10	0.0411621	4.10596e-11	0.011305	0.0656385	0.773358	3.91956e-10	7.60511e-06	0.105806
T36											0.80746	0.248278	3.00997e-10	0.600245	0.623907	9.48374e-17	0.984921	0.377604	3.21785e-10	0.877284	0.482398	3.00997e-10	2.40499e-10	3.21785e-10	3.00997e-10	0.415314	0.484724	3.00997e-10	0.590661	0.992683	0.824363	0.558209	0.676025	0.951503	0.537379	0.992683	0.547292	0.888511	0.462321	0.524533	0.53649	0.981246	0.526362	0.04624	0.591798	2.66041e-10	0.480568	0.157365	0.377604
T67												0.0221891	4.61663e-06	0.34668	0.333991	1.45459e-12	0.795284	0.0337471	4.93546e-06	0.853422	0.274883	4.61663e-06	3.68872e-06	4.93546e-06	4.61663e-06	0.0279534	0.243408	4.61663e-06	0.330839	0.801552	0.667986	0.298737	0.537058	0.762356	0.306826	0.801552	0.316096	0.711412	0.458081	0.299491	0.296781	0.80248	0.391475	0.00311226	0.316714	0.188915	0.286953	0.0349038	0.0337471
T39													0.0690901	0.356553	0.390756	0.0408059	0.267942	0.65751	5.16862e-06	0.352307	0.417655	0.0690901	3.86298e-06	5.16862e-06	0.0690901	0.50296	0.474572	0.0690901	0.380329	0.270053	0.286218	0.387436	0.265797	0.276795	0.346127	0.270053	0.356584	0.280555	0.163758	0.337852	0.341176	0.260352	0.334734	0.165283	0.41075	4.27324e-06	0.367461	0.148616	0.65751
T146														4.3736e-08	6.21373e-07	0.0393938	0.0423621	0.105806	0.935399	0.0562992	0.0692742	1	0.699109	0.935399	1	0.101538	0.0758426	1	4.66524e-08	0.042696	0.0457381	0.0619129	0.0349885	0.0389117	0.0553116	0.042696	0.0569827	3.44138e-12	2.09262e-14	0.0539893	4.18497e-10	0.0411621	4.10596e-11	0.011305	0.0656385	0.773358	3.91956e-10	7.60511e-06	0.105806
UC03															0.962669	1.37802e-14	0.591194	0.542277	4.67565e-08	0.569297	0.742008	4.3736e-08	3.49454e-08	4.67565e-08	4.3736e-08	0.59817	0.786173	4.3736e-08	0.930202	0.595853	0.64559	0.860272	0.558776	0.621431	0.840529	0.595853	0.856737	0.683284	0.296183	0.820436	0.844083	0.621379	0.828147	0.0993599	0.975444	3.86567e-08	0.757027	0.222044	0.542277
R07																1.9578e-13	0.614499	0.594296	6.64286e-07	0.58261	0.774427	6.21373e-07	4.96482e-07	6.64286e-07	6.21373e-07	0.667118	0.781679	6.21373e-07	0.948427	0.619342	0.659451	0.893513	0.577874	0.642671	0.86256	0.619342	0.877743	0.709686	0.305743	0.84194	0.862206	0.637099	0.845927	0.0742753	0.947279	5.4921e-07	0.771763	0.264007	0.594296
T74																	0.0133473	0.0331055	2.94723e-07	0.0177386	0.0218267	0.0393938	0.174063	2.94723e-07	0.0393938	0.0319922	0.0238946	0.0393938	1.46991e-14	0.0134525	0.0941048	0.127384	0.431044	0.0122602	0.0174274	0.0134525	0.11724	1.0843e-18	0.22605	0.0170108	1.31859e-16	0.0129693	1.2937e-17	0.316019	0.0206812	2.43668e-07	0.0975881	2.3962e-12	0.0331055
T108																		0.40751	3.16932e-12	0.883131	0.498595	0.0423621	2.36873e-12	3.16932e-12	0.0423621	0.443454	0.50311	0.0423621	0.581755	0.99218	0.827429	0.570769	0.690552	0.95034	0.568356	0.99218	0.579301	0.875113	0.455349	0.554769	0.528401	0.980396	0.518425	0.0493731	0.605114	2.62029e-12	0.473321	0.154992	0.40751
T135																			0.00078609	0.53582	0.635206	0.105806	0.000587517	0.00078609	0.105806	0.764947	0.721771	0.105806	0.578438	0.410721	0.435307	0.589248	0.37853	0.420974	0.526421	0.410721	0.542325	0.426693	0.249058	0.513836	0.51889	0.395967	0.509094	0.0851673	0.624705	0.000649913	0.558868	0.226029	1
T124																				4.21203e-09	5.18276e-10	0.935399	0.747391	1	0.935399	7.59655e-07	5.67377e-06	0.935399	4.98743e-08	3.1943e-11	3.4219e-14	4.63202e-09	2.61766e-19	2.91118e-14	4.13814e-12	3.1943e-11	4.26316e-11	3.67905e-12	2.23714e-14	4.03922e-14	4.474e-10	3.07955e-12	4.38953e-11	8.45781e-23	4.91075e-09	0.826767	4.19025e-10	8.13034e-06	0.00078609
T148																					0.546465	0.0562992	3.14803e-09	4.21203e-09	0.0562992	0.409874	0.573682	0.0562992	0.574011	0.890091	0.790783	0.55371	0.646775	0.860179	0.528758	0.890091	0.544733	0.822286	0.512092	0.516118	0.514919	0.883482	0.590794	0.0456344	0.587028	0.161221	0.521316	0.121111	0.53582
T147																						0.0692742	3.87355e-10	5.18276e-10	0.0692742	0.570142	0.756264	0.0692742	0.750576	0.502525	0.716149	0.722441	0.618357	0.664528	0.899991	0.502525	0.708121	0.718133	0.38357	0.878476	0.903202	0.515684	0.858967	0.0634782	0.765913	4.28494e-10	0.891095	0.706792	0.635206
T155																							0.699109	0.935399	1	0.101538	0.0758426	1	4.66524e-08	0.042696	0.0457381	0.0619129	0.0349885	0.0389117	0.0553116	0.042696	0.0569827	3.44138e-12	2.09262e-14	0.0539893	4.18497e-10	0.0411621	4.10596e-11	0.011305	0.0656385	0.773358	3.91956e-10	7.60511e-06	0.105806
PW08																								0.747391	0.699109	5.6776e-07	4.24053e-06	0.699109	3.72756e-08	2.38739e-11	0.202096	0.273565	0.154598	2.17579e-14	3.09281e-12	2.38739e-11	0.251781	2.74969e-12	0.132125	3.01887e-14	3.34383e-10	2.30163e-12	3.2807e-11	0.099903	3.67025e-09	0.617919	0.247474	6.07654e-06	0.000587517
PW02																									0.935399	7.59655e-07	5.67377e-06	0.935399	4.98743e-08	3.1943e-11	3.4219e-14	4.63202e-09	2.61766e-19	2.91118e-14	4.13814e-12	3.1943e-11	4.26316e-11	3.67905e-12	2.23714e-14	4.03922e-14	4.474e-10	3.07955e-12	4.38953e-11	8.45781e-23	4.91075e-09	0.826767	4.19025e-10	8.13034e-06	0.00078609
T13B																										0.101538	0.0758426	1	4.66524e-08	0.042696	0.0457381	0.0619129	0.0349885	0.0389117	0.0553116	0.042696	0.0569827	3.44138e-12	2.09262e-14	0.0539893	4.18497e-10	0.0411621	4.10596e-11	0.011305	0.0656385	0.773358	3.91956e-10	7.60511e-06	0.105806
T33																											0.618333	0.101538	0.709856	0.446949	0.464504	0.642869	0.407811	0.453539	0.586398	0.446949	0.591677	0.470672	0.189182	0.57238	0.558754	0.430893	0.548205	0.111337	0.681553	6.28058e-07	0.482423	0.301909	0.764947
PW14																												0.0758426	0.838597	0.507075	0.612057	0.730732	0.501071	0.557256	0.740166	0.507075	0.751381	0.550567	0.279054	0.722472	0.763966	0.545809	0.749543	0.0688437	0.774703	4.69089e-06	0.768122	0.269444	0.721771
PW19																													4.66524e-08	0.042696	0.0457381	0.0619129	0.0349885	0.0389117	0.0553116	0.042696	0.0569827	3.44138e-12	2.09262e-14	0.0539893	4.18497e-10	0.0411621	4.10596e-11	0.011305	0.0656385	0.773358	3.91956e-10	7.60511e-06	0.105806
CIR15																														0.586339	0.648236	0.846225	0.55568	0.617988	0.832779	0.586339	0.84814	0.672126	0.298275	0.812871	0.847542	0.615336	0.831541	0.0790335	0.897146	4.12345e-08	0.774432	0.23685	0.578438
UC21																															0.83395	0.575267	0.683027	0.957829	0.552335	1	0.562747	0.88201	0.458938	0.539132	0.532565	0.988122	0.52251	0.0497622	0.609883	2.64094e-11	0.477051	0.156214	0.410721
UC04																																0.735804	0.806	0.91158	0.761185	0.83395	0.724759	0.932052	0.54126	0.742988	0.764842	0.838338	0.727968	0.0974568	0.647293	2.82912e-14	0.786808	0.454123	0.435307
R13B																																	0.627182	0.59095	0.797601	0.575267	0.968641	0.63525	0.35504	0.778534	0.768661	0.589471	0.754149	0.133491	0.880427	3.8296e-09	0.840076	0.219972	0.589248
UC06																																		0.748442	0.656539	0.683027	0.643855	0.764075	0.598987	0.653102	0.638725	0.684764	0.609504	0.194303	0.563343	2.1642e-19	0.658903	0.394485	0.37853
UC17																																			0.686645	0.957829	0.584343	0.953161	0.504723	0.670231	0.683501	0.95264	0.655328	0.0504959	0.62651	2.40687e-14	0.617663	0.397008	0.420974
UC13																																				0.552335	0.818947	0.776662	0.354314	0.976095	0.968762	0.574029	0.923342	0.0652881	0.845595	3.42128e-12	0.841917	0.549176	0.526421
R26																																					0.562747	0.88201	0.458938	0.539132	0.532565	0.988122	0.52251	0.0497622	0.609883	2.64094e-11	0.477051	0.156214	0.410721
PM32																																						0.623005	0.345419	0.819332	0.769619	0.585321	0.755089	0.127041	0.861494	3.52465e-11	0.831404	0.202455	0.542325
R5																																							0.513826	0.758096	0.788816	0.878021	0.749803	0.0524034	0.673476	3.04172e-12	0.684137	0.454046	0.426693
PM26																																								0.345844	0.36723	0.455924	0.386204	0.344067	0.289592	0.0856294	0.433239	0.24946	0.249058
UC24																																									0.945604	0.581902	0.90127	0.0736189	0.825381	3.33949e-14	0.821791	0.536047	0.513836
PW24																																										0.55834	0.951788	0.0622103	0.814915	3.69895e-10	0.880577	0.593748	0.51889
R19B																																											0.547799	0.0524965	0.624942	2.54607e-12	0.501973	0.150602	0.395967
PM24																																												0.0610358	0.799529	0.168015	0.841975	0.539895	0.509094
T69																																													0.110291	6.99264e-23	0.109722	0.0336138	0.0851673
T152																																														4.06005e-09	0.728024	0.233209	0.624705
T149																																															3.46436e-10	6.7219e-06	0.000649913
T11B																																																0.57144	0.558868
PW18																																																	0.226029
T141
T132
T164
C7
PM31
UC19
PM35
T41
UC18
T137
R14A
[truncated: 22 more columns]

## Sheet: all pairs of - and - reports
ALL NEGATIVE REPORTS
feature terms at level 4 of SNOMED-CT
Case ID	T17A	T08	T07	T19A	T06	T02	T160	T134	T20A	PM09	PW16	T161	PM12	T8	PW04	T157	T20B	T121	T139	T139	T129	T35	T46	T78	T66	T17B	T91	T58	T47	T48	T97	T90	T96	T95	PM05	T09	T49	PW17	R22B	T123	T7	T24B	T150	T56	T156	T25A	PW09	T04	PM06
?/HCC	(-)	(-)	(-)	(-)	(-)	(-)	(-)	(-)	(-)	(-)	(-)	(-)	(-)	(-)	(-)	(-)	(-)	(-)	(-)	(-)	(-)	(-)	(-)	(-)	(-)	(-)	(-)	(-)	(-)	(-)	(-)	(-)	(-)	(-)	(-)	(-)	(-)	(-)	(-)	(-)	(-)	(-)	(-)	(-)	(-)	(-)	(-)	(-)	(-)
Abdominal organ finding	0	0	0	0	0	0	0	0	0	0	0	0	0	0	0	0.0856364	0	0	0.0685091	0	0	0	0	0	0	0	0	0	0	0	0	0	0	0	0	0	0	0	0	0	0	0	0	0.0856364	0	0.114182	0	0	0
Atrophy of liver	0	0	0	0	0	0	0	0	0	0	0	0	0	0	0	0	0	0	0	0	0	0	0	0	0	0	0	0	0	0	0	0	0	0	0	0	0	0	0	0	0	0	0	0	0	0	0	0	0
Blood vessel finding	0	0	0	0	0	0	0	0	0	0	0	0	0	0	0	0	0	0	0.0501304	0	0	0	0	0	0	0	0	0	0	0	0	0	0	0	0	0.062663	0	0	0	0	0	0	0	0	0	0	0	0	0
Disorder of body cavity	0	0	0	0	0	0.079434	0	0	0	0	0	0	0	0	0	0.105912	0	0.079434	0.079434	0	0	0	0.079434	0	0	0	0	0	0	0	0	0	0	0	0	0.052956	0	0	0	0	0	0	0	0.105912	0	0.105912	0	0	0
Disorder of body system	0	0	0	0	0	0.0357805	0	0	0	0	0	0	0	0	0	0.0429366	0	0.0357805	0.0536707	0	0	0	0.0357805	0	0	0	0	0	0	0	0	0	0	0	0	0	0	0	0	0	0	0	0	0.0429366	0	0.0429366	0	0	0
Disorder of cardiovascular system	0	0	0	0	0	0	0	0	0	0	0	0	0	0	0	0.112985	0	0	0.022597	0	0	0	0	0	0	0	0	0	0	0	0	0	0	0	0	0.022597	0	0	0	0	0	0	0	0	0	0	0	0	0
Disorder of digestive system	0	0	0	0	0	0.0560269	0	0	0	0	0	0	0	0	0	0.0700337	0	0.0560269	0	0	0	0	0.0560269	0	0	0	0	0	0	0	0	0	0	0	0	0	0	0	0	0	0	0	0	0.0700337	0	0	0	0	0
Disorder of soft tissue	0	0	0	0	0	0	0	0	0	0	0	0	0	0	0	0	0	0	0.0691336	0	0	0	0	0	0	0	0	0	0	0	0	0	0	0	0	0.0576114	0	0	0	0	0	0	0	0	0	0	0	0	0
Disorder of trunk	0	0	0	0	0	0.0430338	0	0	0	0	0	0	0	0	0	0.0516405	0	0.0430338	0.0860676	0	0	0	0.0430338	0	0	0	0	0	0	0	0	0	0	0	0	0.0368861	0	0	0	0	0	0	0	0.0516405	0	0.0516405	0	0	0
Finding of trunk structure	0	0	0	0	0	0.0252797	0	0	0	0	0	0	0	0	0	0.0353916	0	0.0252797	0.0442394	0	0	0	0.0252797	0	0	0	0	0	0	0	0	0	0	0	0	0	0	0	0	0	0	0	0	0.0353916	0	0.029493	0	0	0
Liver finding	0	0	0	0	0	0	0	0	0	0	0	0	0	0	0	0.091875	0	0	0.0689063	0	0	0	0	0	0	0	0	0	0	0	0	0	0	0	0	0	0	0	0	0	0	0	0	0.091875	0	0	0	0	0
Radiologic finding	0	0	0	0	0	0	0	0	0	0	0	0	0	0	0	0.0378013	0	0.0378013	0	0.0378013	0	0	0	0	0	0	0	0	0	0	0	0	0	0	0	0	0	0	0	0	0	0	0	0	0	0	0	0	0
Cyst of abdomen	0	0	0	0	0	0	0	0	0	0	0	0	0	0	0	0.0662931	0	0	0	0	0	0	0	0	0	0	0	0	0	0	0	0	0	0	0	0	0	0	0	0	0	0	0	0.0662931	0	0	0	0	0
Mass of body region	0	0	0	0	0	0	0	0	0	0	0	0	0	0	0	0.0867193	0	0	0	0	0	0	0	0	0	0	0	0	0	0	0	0	0	0	0	0	0	0	0	0	0	0	0	0.0867193	0	0	0	0	0
Mass of digestive structure	0	0	0	0	0	0	0	0	0	0	0	0	0	0	0	0.216798	0	0	0	0	0	0	0	0	0	0	0	0	0	0	0	0	0	0	0	0	0	0	0	0	0	0	0	0.216798	0	0	0	0	0
Neoplastic disease	0	0	0	0	0	0	0	0	0	0	0	0	0	0	0	0	0	0.0416667	0	0	0	0	0	0	0	0	0	0	0	0	0	0	0	0	0	0	0	0	0	0	0	0	0	0	0	0	0	0	0
Growth alteration	0	0	0	0	0	0	0	0	0	0	0	0	0	0	0	0	0	0	0	0	0	0	0	0	0	0	0	0	0	0	0	0	0	0	0	0	0	0	0	0	0	0	0	0	0	0	0	0	0
Imaging result abnormal	0	0	0	0	0	0	0	0	0	0	0	0	0	0	0	0	0	0	0	0.0393811	0	0	0	0	0	0	0	0	0	0	0	0	0	0	0	0	0	0	0	0	0	0	0	0	0	0	0	0	0
Mechanical abnormality	0	0	0	0	0	0	0	0	0	0	0	0	0	0	0	0	0	0	0	0	0	0	0	0	0	0	0	0	0	0	0	0	0	0	0	0	0	0	0	0	0	0	0	0	0	0	0	0	0
Steatosis of liver	0	0	0	0	0	0	0	0	0	0	0	0	0	0	0	0	0	0	0	0	0	0	0	0	0	0	0	0	0	0	0	0	0	0	0	0.0589134	0	0	0	0	0	0	0	0	0	0	0	0	0
Finding of biliary tract	0	0	0	0	0	0.0517668	0	0	0	0	0	0	0	0	0	0	0	0.0517668	0	0	0	0	0.0517668	0	0	0	0	0	0	0	0	0	0	0	0	0	0	0	0	0	0	0	0	0	0	0	0	0	0
Hemorrhage into peritoneal cavity	0	0	0	0	0	0	0	0	0	0	0	0	0	0	0	0	0	0	0	0	0	0	0	0	0	0	0	0	0	0	0	0	0	0	0	0	0	0	0	0	0	0	0	0	0	0	0	0	0
Disorder of connective tissue	0	0	0	0	0	0	0	0	0	0	0	0	0	0	0	0	0	0	0	0	0	0	0	0	0	0	0	0	0	0	0	0	0	0	0	0	0	0	0	0	0	0	0	0	0	0	0	0	0
Nontraumatic hemoperitoneum	0	0	0	0	0	0	0	0	0	0	0	0	0	0	0	0	0	0	0	0	0	0	0	0	0	0	0	0	0	0	0	0	0	0	0	0	0	0	0	0	0	0	0	0	0	0	0	0	0
Degenerative abnormality	0	0	0	0	0	0	0	0	0	0.0800561	0	0	0	0	0	0	0	0	0	0	0	0	0	0	0	0	0	0	0	0	0	0	0	0	0	0	0	0	0	0	0	0	0	0	0	0	0	0	0
Mass	0	0	0	0	0	0	0	0	0	0.320803	0	0	0	0	0	0	0	0	0	0	0	0	0	0	0	0	0	0	0	0	0	0	0	0	0	0	0	0	0	0	0	0	0	0	0	0	0	0	0
Traumatic and/or non-traumatic injury of anatomical site	0	0	0	0	0	0	0	0	0	0	0	0	0	0	0	0	0	0	0	0	0	0	0	0	0	0	0	0	0	0	0	0	0	0	0	0	0	0	0	0	0	0	0	0	0	0	0	0	0
Abnormal radiologic density, diffuse	0	0	0	0	0	0	0	0	0	0	0	0	0	0	0	0	0	0	0	0	0	0	0	0	0	0	0	0	0	0	0	0	0	0	0	0	0	0	0	0	0	0	0	0	0	0	0	0	0
Imaging result abnormal	0	0	0	0	0	0	0	0	0	0	0	0	0	0	0	0	0	0.0353529	0	0	0	0	0	0	0	0	0	0	0	0	0	0	0	0	0	0	0	0	0	0	0	0	0	0	0	0	0	0	0
Abnormal radiologic density, irregular	0	0	0	0	0	0	0	0	0	0	0	0	0	0	0	0	0	0	0	0	0	0	0	0	0	0	0	0	0	0	0	0	0	0	0	0	0	0	0	0	0	0	0	0	0	0	0	0	0
Abnormal radiologic density, nodular	0	0	0	0	0	0	0	0	0	0	0	0	0	0	0	0	0	0.208077	0	0	0	0	0	0	0	0	0	0	0	0	0	0	0	0	0	0	0	0	0	0	0	0	0	0	0	0	0	0	0
Abnormal radiologic density, small area	0	0	0	0	0	0	0	0	0	0	0	0	0	0	0	0	0	0	0	0	0	0	0	0	0	0	0	0	0	0	0	0	0	0	0	0	0	0	0	0	0	0	0	0	0	0	0	0	0
Multiple lesions	0	0	0	0	0	0	0	0	0	0	0	0	0	0	0	0	0	0	0	0	0	0	0	0	0	0	0	0	0	0	0	0	0	0	0	0	0	0	0	0	0	0	0	0	0	0	0	0	0
Finding of number of lesions	0	0	0	0	0	0	0	0	0	0	0	0	0	0	0	0	0	0	0	0	0	0	0	0	0	0	0	0	0	0	0	0	0	0	0	0	0	0	0	0	0	0	0	0	0	0	0	0	0
Heterotopia	0	0	0	0	0	0	0	0	0	0	0	0	0	0	0	0	0	0	0	0	0	0	0	0	0	0	0	0	0	0	0	0	0	0	0	0	0	0	0	0	0	0	0	0	0	0	0	0	0
Degenerative abnormality	0	0	0	0	0	0	0	0	0	0	0	0	0	0	0	0	0	0	0	0	0	0	0	0	0	0	0	0	0	0	0	0	0	0	0	0	0	0	0	0	0	0	0	0	0	0	0	0	0
constant	1	1	1	1	1	1e-06	1	1	1	0.01	1	1	1	1	1	1e-12	1	1e-10	1e-09	0.01	1	1	1e-06	1	1	1	1	1	1	1	1	1	1	1	1	1e-06	1	1	1	1	1	1	1	1e-10	1	1e-05	1	1	1
	0	0	0	0	0	0	0	0	0	0	0	0	0	0	0	0	0	0	0	0	0	0	0	0	0	0	0	0	0	0	0	0	0	0	0	0	0	0	0	0	0	0	0	0	0	0	0	0	0
	0	0	0	0	0	0	0	0	0	0	0	0	0	0	0	0	0	0	0	0	0	0	0	0	0	0	0	0	0	0	0	0	0	0	0	0	0	0	0	0	0	0	0	0	0	0	0	0	0
	0	0	0	0	0	0	0	0	0	0	0	0	0	0	0	0	0	0	0	0	0	0	0	0	0	0	0	0	0	0	0	0	0	0	0	0	0	0	0	0	0	0	0	0	0	0	0	0	0
	0	0	0	0	0	0	0	0	0	0	0	0	0	0	0	0	0	0	0	0	0	0	0	0	0	0	0	0	0	0	0	0	0	0	0	0	0	0	0	0	0	0	0	0	0	0	0	0	0
	0	0	0	0	0	0	0	0	0	0	0	0	0	0	0	0	0	0	0	0	0	0	0	0	0	0	0	0	0	0	0	0	0	0	0	0	0	0	0	0	0	0	0	0	0	0	0	0	0
	0	0	0	0	0	0	0	0	0	0	0	0	0	0	0	0	0	0	0	0	0	0	0	0	0	0	0	0	0	0	0	0	0	0	0	0	0	0	0	0	0	0	0	0	0	0	0	0	0
	0	0	0	0	0	0	0	0	0	0	0	0	0	0	0	0	0	0	0	0	0	0	0	0	0	0	0	0	0	0	0	0	0	0	0	0	0	0	0	0	0	0	0	0	0	0	0	0	0
	0	0	0	0	0	0	0	0	0	0	0	0	0	0	0	0	0	0	0	0	0	0	0	0	0	0	0	0	0	0	0	0	0	0	0	0	0	0	0	0	0	0	0	0	0	0	0	0	0
	0	0	0	0	0	0	0	0	0	0	0	0	0	0	0	0	0	0	0	0	0	0	0	0	0	0	0	0	0	0	0	0	0	0	0	0	0	0	0	0	0	0	0	0	0	0	0	0	0
	0	0	0	0	0	0	0	0	0	0	0	0	0	0	0	0	0	0	0	0	0	0	0	0	0	0	0	0	0	0	0	0	0	0	0	0	0	0	0	0	0	0	0	0	0	0	0	0	0
	0	0	0	0	0	0	0	0	0	0	0	0	0	0	0	0	0	0	0	0	0	0	0	0	0	0	0	0	0	0	0	0	0	0	0	0	0	0	0	0	0	0	0	0	0	0	0	0	0
	0	0	0	0	0	0	0	0	0	0	0	0	0	0	0	0	0	0	0	0	0	0	0	0	0	0	0	0	0	0	0	0	0	0	0	0	0	0	0	0	0	0	0	0	0	0	0	0	0
	0	0	0	0	0	0	0	0	0	0	0	0	0	0	0	0	0	0	0	0	0	0	0	0	0	0	0	0	0	0	0	0	0	0	0	0	0	0	0	0	0	0	0	0	0	0	0	0	0
	0	0	0	0	0	0	0	0	0	0	0	0	0	0	0	0	0	0	0	0	0	0	0	0	0	0	0	0	0	0	0	0	0	0	0	0	0	0	0	0	0	0	0	0	0	0	0	0	0
	0	0	0	0	0	0	0	0	0	0	0	0	0	0	0	0	0	0	0	0	0	0	0	0	0	0	0	0	0	0	0	0	0	0	0	0	0	0	0	0	0	0	0	0	0	0	0	0	0
	0	0	0	0	0	0	0	0	0	0	0	0	0	0	0	0	0	0	0	0	0	0	0	0	0	0	0	0	0	0	0	0	0	0	0	0	0	0	0	0	0	0	0	0	0	0	0	0	0
	0	0	0	0	0	0	0	0	0	0	0	0	0	0	0	0	0	0	0	0	0	0	0	0	0	0	0	0	0	0	0	0	0	0	0	0	0	0	0	0	0	0	0	0	0	0	0	0	0
	0	0	0	0	0	0	0	0	0	0	0	0	0	0	0	0	0	0	0	0	0	0	0	0	0	0	0	0	0	0	0	0	0	0	0	0	0	0	0	0	0	0	0	0	0	0	0	0	0
	0	0	0	0	0	0	0	0	0	0	0	0	0	0	0	0	0	0	0	0	0	0	0	0	0	0	0	0	0	0	0	0	0	0	0	0	0	0	0	0	0	0	0	0	0	0	0	0	0
	0	0	0	0	0	0	0	0	0	0	0	0	0	0	0	0	0	0	0	0	0	0	0	0	0	0	0	0	0	0	0	0	0	0	0	0	0	0	0	0	0	0	0	0	0	0	0	0	0
	0	0	0	0	0	0	0	0	0	0	0	0	0	0	0	0	0	0	0	0	0	0	0	0	0	0	0	0	0	0	0	0	0	0	0	0	0	0	0	0	0	0	0	0	0	0	0	0	0
	0	0	0	0	0	0	0	0	0	0	0	0	0	0	0	0	0	0	0	0	0	0	0	0	0	0	0	0	0	0	0	0	0	0	0	0	0	0	0	0	0	0	0	0	0	0	0	0	0
magnitude of vector (vector length)	1	1	1	1	1	0.126094	1	1	1	0.330792	1	1	1	1	1	0.332822	1	0.252212	0.189208	0.055496	1	1	0.126094	1	1	1	1	1	1	1	1	1	1	1	1	0.124065	1	1	1	1	1	1	1	0.310767	1	0.172148	1	1	1
similarity score	T17A	T08	T07	T19A	T06	T02	T160	T134	T20A	PM09	PW16	T161	PM12	T8	PW04	T157	T20B	T121	T139	T139	T129	T35	T46	T78	T66	T17B	T91	T58	T47	T48	T97	T90	T96	T95	PM05	T09	T49	PW17	R22B	T123	T7	T24B	T150	T56	T156	T25A	PW09	T04	PM06
T17A		1	1	1	1	7.93057e-06	1	1	1	0.0302305	1	1	1	1	1	3.00461e-12	1	3.96492e-10	5.28518e-09	0.180193	1	1	7.93057e-06	1	1	1	1	1	1	1	1	1	1	1	1	8.06031e-06	1	1	1	1	1	1	1	3.21785e-10	1	5.80895e-05	1	1	1
T08			1	1	1	7.93057e-06	1	1	1	0.0302305	1	1	1	1	1	3.00461e-12	1	3.96492e-10	5.28518e-09	0.180193	1	1	7.93057e-06	1	1	1	1	1	1	1	1	1	1	1	1	8.06031e-06	1	1	1	1	1	1	1	3.21785e-10	1	5.80895e-05	1	1	1
T07				1	1	7.93057e-06	1	1	1	0.0302305	1	1	1	1	1	3.00461e-12	1	3.96492e-10	5.28518e-09	0.180193	1	1	7.93057e-06	1	1	1	1	1	1	1	1	1	1	1	1	8.06031e-06	1	1	1	1	1	1	1	3.21785e-10	1	5.80895e-05	1	1	1
T19A					1	7.93057e-06	1	1	1	0.0302305	1	1	1	1	1	3.00461e-12	1	3.96492e-10	5.28518e-09	0.180193	1	1	7.93057e-06	1	1	1	1	1	1	1	1	1	1	1	1	8.06031e-06	1	1	1	1	1	1	1	3.21785e-10	1	5.80895e-05	1	1	1
T06						7.93057e-06	1	1	1	0.0302305	1	1	1	1	1	3.00461e-12	1	3.96492e-10	5.28518e-09	0.180193	1	1	7.93057e-06	1	1	1	1	1	1	1	1	1	1	1	1	8.06031e-06	1	1	1	1	1	1	1	3.21785e-10	1	5.80895e-05	1	1	1
T02							7.93057e-06	7.93057e-06	7.93057e-06	2.39745e-07	7.93057e-06	7.93057e-06	7.93057e-06	7.93057e-06	7.93057e-06	0.404843	7.93057e-06	0.499955	0.54708	1.42903e-06	7.93057e-06	7.93057e-06	1	7.93057e-06	7.93057e-06	7.93057e-06	7.93057e-06	7.93057e-06	7.93057e-06	7.93057e-06	7.93057e-06	7.93057e-06	7.93057e-06	7.93057e-06	7.93057e-06	0.37036	7.93057e-06	7.93057e-06	7.93057e-06	7.93057e-06	7.93057e-06	7.93057e-06	7.93057e-06	0.433575	7.93057e-06	0.595072	7.93057e-06	7.93057e-06	7.93057e-06
T160								1	1	0.0302305	1	1	1	1	1	3.00461e-12	1	3.96492e-10	5.28518e-09	0.180193	1	1	7.93057e-06	1	1	1	1	1	1	1	1	1	1	1	1	8.06031e-06	1	1	1	1	1	1	1	3.21785e-10	1	5.80895e-05	1	1	1
T134									1	0.0302305	1	1	1	1	1	3.00461e-12	1	3.96492e-10	5.28518e-09	0.180193	1	1	7.93057e-06	1	1	1	1	1	1	1	1	1	1	1	1	8.06031e-06	1	1	1	1	1	1	1	3.21785e-10	1	5.80895e-05	1	1	1
T20A										0.0302305	1	1	1	1	1	3.00461e-12	1	3.96492e-10	5.28518e-09	0.180193	1	1	7.93057e-06	1	1	1	1	1	1	1	1	1	1	1	1	8.06031e-06	1	1	1	1	1	1	1	3.21785e-10	1	5.80895e-05	1	1	1
PM09											0.0302305	0.0302305	0.0302305	0.0302305	0.0302305	9.08307e-14	0.0302305	1.19861e-11	1.59774e-10	0.00544732	0.0302305	0.0302305	2.39745e-07	0.0302305	0.0302305	0.0302305	0.0302305	0.0302305	0.0302305	0.0302305	0.0302305	0.0302305	0.0302305	0.0302305	0.0302305	2.43667e-07	0.0302305	0.0302305	0.0302305	0.0302305	0.0302305	0.0302305	0.0302305	9.7277e-12	0.0302305	1.75607e-06	0.0302305	0.0302305	0.0302305
PW16												1	1	1	1	3.00461e-12	1	3.96492e-10	5.28518e-09	0.180193	1	1	7.93057e-06	1	1	1	1	1	1	1	1	1	1	1	1	8.06031e-06	1	1	1	1	1	1	1	3.21785e-10	1	5.80895e-05	1	1	1
T161													1	1	1	3.00461e-12	1	3.96492e-10	5.28518e-09	0.180193	1	1	7.93057e-06	1	1	1	1	1	1	1	1	1	1	1	1	8.06031e-06	1	1	1	1	1	1	1	3.21785e-10	1	5.80895e-05	1	1	1
PM12														1	1	3.00461e-12	1	3.96492e-10	5.28518e-09	0.180193	1	1	7.93057e-06	1	1	1	1	1	1	1	1	1	1	1	1	8.06031e-06	1	1	1	1	1	1	1	3.21785e-10	1	5.80895e-05	1	1	1
T8															1	3.00461e-12	1	3.96492e-10	5.28518e-09	0.180193	1	1	7.93057e-06	1	1	1	1	1	1	1	1	1	1	1	1	8.06031e-06	1	1	1	1	1	1	1	3.21785e-10	1	5.80895e-05	1	1	1
PW04																3.00461e-12	1	3.96492e-10	5.28518e-09	0.180193	1	1	7.93057e-06	1	1	1	1	1	1	1	1	1	1	1	1	8.06031e-06	1	1	1	1	1	1	1	3.21785e-10	1	5.80895e-05	1	1	1
T157																	3.00461e-12	0.219426	0.499875	0.0773642	3.00461e-12	3.00461e-12	0.404843	3.00461e-12	3.00461e-12	3.00461e-12	3.00461e-12	3.00461e-12	3.00461e-12	3.00461e-12	3.00461e-12	3.00461e-12	3.00461e-12	3.00461e-12	3.00461e-12	0.243794	3.00461e-12	3.00461e-12	3.00461e-12	3.00461e-12	3.00461e-12	3.00461e-12	3.00461e-12	0.933733	3.00461e-12	0.463386	3.00461e-12	3.00461e-12	3.00461e-12
T20B																		3.96492e-10	5.28518e-09	0.180193	1	1	7.93057e-06	1	1	1	1	1	1	1	1	1	1	1	1	8.06031e-06	1	1	1	1	1	1	1	3.21785e-10	1	5.80895e-05	1	1	1
T121																			0.273515	0.102091	3.96492e-10	3.96492e-10	0.499955	3.96492e-10	3.96492e-10	3.96492e-10	3.96492e-10	3.96492e-10	3.96492e-10	3.96492e-10	3.96492e-10	3.96492e-10	3.96492e-10	3.96492e-10	3.96492e-10	0.185163	3.96492e-10	3.96492e-10	3.96492e-10	3.96492e-10	3.96492e-10	3.96492e-10	3.96492e-10	0.216768	3.96492e-10	0.297509	3.96492e-10	3.96492e-10	3.96492e-10
T139																				9.52353e-10	5.28518e-09	5.28518e-09	0.54708	5.28518e-09	5.28518e-09	5.28518e-09	5.28518e-09	5.28518e-09	5.28518e-09	5.28518e-09	5.28518e-09	5.28518e-09	5.28518e-09	5.28518e-09	5.28518e-09	0.639686	5.28518e-09	5.28518e-09	5.28518e-09	5.28518e-09	5.28518e-09	5.28518e-09	5.28518e-09	0.491931	5.28518e-09	0.745714	5.28518e-09	5.28518e-09	5.28518e-09
T139																					0.180193	0.180193	1.42903e-06	0.180193	0.180193	0.180193	0.180193	0.180193	0.180193	0.180193	0.180193	0.180193	0.180193	0.180193	0.180193	1.45241e-06	0.180193	0.180193	0.180193	0.180193	0.180193	0.180193	0.180193	5.79834e-11	0.180193	1.04673e-05	0.180193	0.180193	0.180193
T129																						1	7.93057e-06	1	1	1	1	1	1	1	1	1	1	1	1	8.06031e-06	1	1	1	1	1	1	1	3.21785e-10	1	5.80895e-05	1	1	1
T35																							7.93057e-06	1	1	1	1	1	1	1	1	1	1	1	1	8.06031e-06	1	1	1	1	1	1	1	3.21785e-10	1	5.80895e-05	1	1	1
T46																								7.93057e-06	7.93057e-06	7.93057e-06	7.93057e-06	7.93057e-06	7.93057e-06	7.93057e-06	7.93057e-06	7.93057e-06	7.93057e-06	7.93057e-06	7.93057e-06	0.37036	7.93057e-06	7.93057e-06	7.93057e-06	7.93057e-06	7.93057e-06	7.93057e-06	7.93057e-06	0.433575	7.93057e-06	0.595072	7.93057e-06	7.93057e-06	7.93057e-06
T78																									1	1	1	1	1	1	1	1	1	1	1	8.06031e-06	1	1	1	1	1	1	1	3.21785e-10	1	5.80895e-05	1	1	1
T66																										1	1	1	1	1	1	1	1	1	1	8.06031e-06	1	1	1	1	1	1	1	3.21785e-10	1	5.80895e-05	1	1	1
T17B																											1	1	1	1	1	1	1	1	1	8.06031e-06	1	1	1	1	1	1	1	3.21785e-10	1	5.80895e-05	1	1	1
T91																												1	1	1	1	1	1	1	1	8.06031e-06	1	1	1	1	1	1	1	3.21785e-10	1	5.80895e-05	1	1	1
T58																													1	1	1	1	1	1	1	8.06031e-06	1	1	1	1	1	1	1	3.21785e-10	1	5.80895e-05	1	1	1
T47																														1	1	1	1	1	1	8.06031e-06	1	1	1	1	1	1	1	3.21785e-10	1	5.80895e-05	1	1	1
T48																															1	1	1	1	1	8.06031e-06	1	1	1	1	1	1	1	3.21785e-10	1	5.80895e-05	1	1	1
T97																																1	1	1	1	8.06031e-06	1	1	1	1	1	1	1	3.21785e-10	1	5.80895e-05	1	1	1
T90																																	1	1	1	8.06031e-06	1	1	1	1	1	1	1	3.21785e-10	1	5.80895e-05	1	1	1
T96																																		1	1	8.06031e-06	1	1	1	1	1	1	1	3.21785e-10	1	5.80895e-05	1	1	1
T95																																			1	8.06031e-06	1	1	1	1	1	1	1	3.21785e-10	1	5.80895e-05	1	1	1
PM05																																				8.06031e-06	1	1	1	1	1	1	1	3.21785e-10	1	5.80895e-05	1	1	1
T09																																					8.06031e-06	8.06031e-06	8.06031e-06	8.06031e-06	8.06031e-06	8.06031e-06	8.06031e-06	0.194876	8.06031e-06	0.351796	8.06031e-06	8.06031e-06	8.06031e-06
T49																																						1	1	1	1	1	1	3.21785e-10	1	5.80895e-05	1	1	1
PW17																																							1	1	1	1	1	3.21785e-10	1	5.80895e-05	1	1	1
R22B																																								1	1	1	1	3.21785e-10	1	5.80895e-05	1	1	1
T123																																									1	1	1	3.21785e-10	1	5.80895e-05	1	1	1
T7																																										1	1	3.21785e-10	1	5.80895e-05	1	1	1
T24B																																											1	3.21785e-10	1	5.80895e-05	1	1	1
T150																																												3.21785e-10	1	5.80895e-05	1	1	1
T56																																													3.21785e-10	0.496273	3.21785e-10	3.21785e-10	3.21785e-10
T156																																														5.80895e-05	1	1	1
T25A																																															5.80895e-05	5.80895e-05	5.80895e-05
PW09																																																1	1
T04																																																	1
PM06
PW03
T16B
T110
T140
[truncated: 16 more columns]

## Sheet: all pairs of + and - reports
ALL NEGATIVE REPORTS
feature terms at level 4 of SNOMED-CT
Case ID	T17A	T08	T07	T19A	T06	T02	T160	T134	T20A	PM09	PW16	T161	PM12	T8	PW04	T157	T20B	T121	T139	T139	T129	T35	T46	T78	T66	T17B	T91	T58	T47	T48	T97	T90	T96	T95	PM05	T09	T49	PW17	R22B	T123	T7	T24B	T150	T56	T156	T25A	PW09	T04	PM06
?/HCC	(-)	(-)	(-)	(-)	(-)	(-)	(-)	(-)	(-)	(-)	(-)	(-)	(-)	(-)	(-)	(-)	(-)	(-)	(-)	(-)	(-)	(-)	(-)	(-)	(-)	(-)	(-)	(-)	(-)	(-)	(-)	(-)	(-)	(-)	(-)	(-)	(-)	(-)	(-)	(-)	(-)	(-)	(-)	(-)	(-)	(-)	(-)	(-)	(-)
Abdominal organ finding	0	0	0	0	0	0	0	0	0	0	0	0	0	0	0	0.0856364	0	0	0.0685091	0	0	0	0	0	0	0	0	0	0	0	0	0	0	0	0	0	0	0	0	0	0	0	0	0.0856364	0	0.114182	0	0	0
Atrophy of liver	0	0	0	0	0	0	0	0	0	0	0	0	0	0	0	0	0	0	0	0	0	0	0	0	0	0	0	0	0	0	0	0	0	0	0	0	0	0	0	0	0	0	0	0	0	0	0	0	0
Blood vessel finding	0	0	0	0	0	0	0	0	0	0	0	0	0	0	0	0	0	0	0.0501304	0	0	0	0	0	0	0	0	0	0	0	0	0	0	0	0	0.062663	0	0	0	0	0	0	0	0	0	0	0	0	0
Disorder of body cavity	0	0	0	0	0	0.079434	0	0	0	0	0	0	0	0	0	0.105912	0	0.079434	0.079434	0	0	0	0.079434	0	0	0	0	0	0	0	0	0	0	0	0	0.052956	0	0	0	0	0	0	0	0.105912	0	0.105912	0	0	0
Disorder of body system	0	0	0	0	0	0.0357805	0	0	0	0	0	0	0	0	0	0.0429366	0	0.0357805	0.0536707	0	0	0	0.0357805	0	0	0	0	0	0	0	0	0	0	0	0	0	0	0	0	0	0	0	0	0.0429366	0	0.0429366	0	0	0
Disorder of cardiovascular system	0	0	0	0	0	0	0	0	0	0	0	0	0	0	0	0.112985	0	0	0.022597	0	0	0	0	0	0	0	0	0	0	0	0	0	0	0	0	0.022597	0	0	0	0	0	0	0	0	0	0	0	0	0
Disorder of digestive system	0	0	0	0	0	0.0560269	0	0	0	0	0	0	0	0	0	0.0700337	0	0.0560269	0	0	0	0	0.0560269	0	0	0	0	0	0	0	0	0	0	0	0	0	0	0	0	0	0	0	0	0.0700337	0	0	0	0	0
Disorder of soft tissue	0	0	0	0	0	0	0	0	0	0	0	0	0	0	0	0	0	0	0.0691336	0	0	0	0	0	0	0	0	0	0	0	0	0	0	0	0	0.0576114	0	0	0	0	0	0	0	0	0	0	0	0	0
Disorder of trunk	0	0	0	0	0	0.0430338	0	0	0	0	0	0	0	0	0	0.0516405	0	0.0430338	0.0860676	0	0	0	0.0430338	0	0	0	0	0	0	0	0	0	0	0	0	0.0368861	0	0	0	0	0	0	0	0.0516405	0	0.0516405	0	0	0
Finding of trunk structure	0	0	0	0	0	0.0252797	0	0	0	0	0	0	0	0	0	0.0353916	0	0.0252797	0.0442394	0	0	0	0.0252797	0	0	0	0	0	0	0	0	0	0	0	0	0	0	0	0	0	0	0	0	0.0353916	0	0.029493	0	0	0
Liver finding	0	0	0	0	0	0	0	0	0	0	0	0	0	0	0	0.091875	0	0	0.0689063	0	0	0	0	0	0	0	0	0	0	0	0	0	0	0	0	0	0	0	0	0	0	0	0	0.091875	0	0	0	0	0
Radiologic finding	0	0	0	0	0	0	0	0	0	0	0	0	0	0	0	0.0378013	0	0.0378013	0	0.0378013	0	0	0	0	0	0	0	0	0	0	0	0	0	0	0	0	0	0	0	0	0	0	0	0	0	0	0	0	0
Cyst of abdomen	0	0	0	0	0	0	0	0	0	0	0	0	0	0	0	0.0662931	0	0	0	0	0	0	0	0	0	0	0	0	0	0	0	0	0	0	0	0	0	0	0	0	0	0	0	0.0662931	0	0	0	0	0
Mass of body region	0	0	0	0	0	0	0	0	0	0	0	0	0	0	0	0.0867193	0	0	0	0	0	0	0	0	0	0	0	0	0	0	0	0	0	0	0	0	0	0	0	0	0	0	0	0.0867193	0	0	0	0	0
Mass of digestive structure	0	0	0	0	0	0	0	0	0	0	0	0	0	0	0	0.216798	0	0	0	0	0	0	0	0	0	0	0	0	0	0	0	0	0	0	0	0	0	0	0	0	0	0	0	0.216798	0	0	0	0	0
Neoplastic disease	0	0	0	0	0	0	0	0	0	0	0	0	0	0	0	0	0	0.0416667	0	0	0	0	0	0	0	0	0	0	0	0	0	0	0	0	0	0	0	0	0	0	0	0	0	0	0	0	0	0	0
Growth alteration	0	0	0	0	0	0	0	0	0	0	0	0	0	0	0	0	0	0	0	0	0	0	0	0	0	0	0	0	0	0	0	0	0	0	0	0	0	0	0	0	0	0	0	0	0	0	0	0	0
Imaging result abnormal	0	0	0	0	0	0	0	0	0	0	0	0	0	0	0	0	0	0	0	0.0393811	0	0	0	0	0	0	0	0	0	0	0	0	0	0	0	0	0	0	0	0	0	0	0	0	0	0	0	0	0
Mechanical abnormality	0	0	0	0	0	0	0	0	0	0	0	0	0	0	0	0	0	0	0	0	0	0	0	0	0	0	0	0	0	0	0	0	0	0	0	0	0	0	0	0	0	0	0	0	0	0	0	0	0
Steatosis of liver	0	0	0	0	0	0	0	0	0	0	0	0	0	0	0	0	0	0	0	0	0	0	0	0	0	0	0	0	0	0	0	0	0	0	0	0.0589134	0	0	0	0	0	0	0	0	0	0	0	0	0
Finding of biliary tract	0	0	0	0	0	0.0517668	0	0	0	0	0	0	0	0	0	0	0	0.0517668	0	0	0	0	0.0517668	0	0	0	0	0	0	0	0	0	0	0	0	0	0	0	0	0	0	0	0	0	0	0	0	0	0
Hemorrhage into peritoneal cavity	0	0	0	0	0	0	0	0	0	0	0	0	0	0	0	0	0	0	0	0	0	0	0	0	0	0	0	0	0	0	0	0	0	0	0	0	0	0	0	0	0	0	0	0	0	0	0	0	0
Disorder of connective tissue	0	0	0	0	0	0	0	0	0	0	0	0	0	0	0	0	0	0	0	0	0	0	0	0	0	0	0	0	0	0	0	0	0	0	0	0	0	0	0	0	0	0	0	0	0	0	0	0	0
Nontraumatic hemoperitoneum	0	0	0	0	0	0	0	0	0	0	0	0	0	0	0	0	0	0	0	0	0	0	0	0	0	0	0	0	0	0	0	0	0	0	0	0	0	0	0	0	0	0	0	0	0	0	0	0	0
Degenerative abnormality	0	0	0	0	0	0	0	0	0	0.0800561	0	0	0	0	0	0	0	0	0	0	0	0	0	0	0	0	0	0	0	0	0	0	0	0	0	0	0	0	0	0	0	0	0	0	0	0	0	0	0
Mass	0	0	0	0	0	0	0	0	0	0.320803	0	0	0	0	0	0	0	0	0	0	0	0	0	0	0	0	0	0	0	0	0	0	0	0	0	0	0	0	0	0	0	0	0	0	0	0	0	0	0
Traumatic and/or non-traumatic injury of anatomical site	0	0	0	0	0	0	0	0	0	0	0	0	0	0	0	0	0	0	0	0	0	0	0	0	0	0	0	0	0	0	0	0	0	0	0	0	0	0	0	0	0	0	0	0	0	0	0	0	0
Abnormal radiologic density, diffuse	0	0	0	0	0	0	0	0	0	0	0	0	0	0	0	0	0	0	0	0	0	0	0	0	0	0	0	0	0	0	0	0	0	0	0	0	0	0	0	0	0	0	0	0	0	0	0	0	0
Imaging result abnormal	0	0	0	0	0	0	0	0	0	0	0	0	0	0	0	0	0	0.0353529	0	0	0	0	0	0	0	0	0	0	0	0	0	0	0	0	0	0	0	0	0	0	0	0	0	0	0	0	0	0	0
Abnormal radiologic density, irregular	0	0	0	0	0	0	0	0	0	0	0	0	0	0	0	0	0	0	0	0	0	0	0	0	0	0	0	0	0	0	0	0	0	0	0	0	0	0	0	0	0	0	0	0	0	0	0	0	0
Abnormal radiologic density, nodular	0	0	0	0	0	0	0	0	0	0	0	0	0	0	0	0	0	0.208077	0	0	0	0	0	0	0	0	0	0	0	0	0	0	0	0	0	0	0	0	0	0	0	0	0	0	0	0	0	0	0
Abnormal radiologic density, small area	0	0	0	0	0	0	0	0	0	0	0	0	0	0	0	0	0	0	0	0	0	0	0	0	0	0	0	0	0	0	0	0	0	0	0	0	0	0	0	0	0	0	0	0	0	0	0	0	0
Multiple lesions	0	0	0	0	0	0	0	0	0	0	0	0	0	0	0	0	0	0	0	0	0	0	0	0	0	0	0	0	0	0	0	0	0	0	0	0	0	0	0	0	0	0	0	0	0	0	0	0	0
Finding of number of lesions	0	0	0	0	0	0	0	0	0	0	0	0	0	0	0	0	0	0	0	0	0	0	0	0	0	0	0	0	0	0	0	0	0	0	0	0	0	0	0	0	0	0	0	0	0	0	0	0	0
Heterotopia	0	0	0	0	0	0	0	0	0	0	0	0	0	0	0	0	0	0	0	0	0	0	0	0	0	0	0	0	0	0	0	0	0	0	0	0	0	0	0	0	0	0	0	0	0	0	0	0	0
Degenerative abnormality	0	0	0	0	0	0	0	0	0	0	0	0	0	0	0	0	0	0	0	0	0	0	0	0	0	0	0	0	0	0	0	0	0	0	0	0	0	0	0	0	0	0	0	0	0	0	0	0	0
constant	1	1	1	1	1	1e-06	1	1	1	0.01	1	1	1	1	1	1e-12	1	1e-10	1e-09	0.01	1	1	1e-06	1	1	1	1	1	1	1	1	1	1	1	1	1e-06	1	1	1	1	1	1	1	1e-10	1	1e-05	1	1	1
	0	0	0	0	0	0	0	0	0	0	0	0	0	0	0	0	0	0	0	0	0	0	0	0	0	0	0	0	0	0	0	0	0	0	0	0	0	0	0	0	0	0	0	0	0	0	0	0	0
	0	0	0	0	0	0	0	0	0	0	0	0	0	0	0	0	0	0	0	0	0	0	0	0	0	0	0	0	0	0	0	0	0	0	0	0	0	0	0	0	0	0	0	0	0	0	0	0	0
	0	0	0	0	0	0	0	0	0	0	0	0	0	0	0	0	0	0	0	0	0	0	0	0	0	0	0	0	0	0	0	0	0	0	0	0	0	0	0	0	0	0	0	0	0	0	0	0	0
	0	0	0	0	0	0	0	0	0	0	0	0	0	0	0	0	0	0	0	0	0	0	0	0	0	0	0	0	0	0	0	0	0	0	0	0	0	0	0	0	0	0	0	0	0	0	0	0	0
	0	0	0	0	0	0	0	0	0	0	0	0	0	0	0	0	0	0	0	0	0	0	0	0	0	0	0	0	0	0	0	0	0	0	0	0	0	0	0	0	0	0	0	0	0	0	0	0	0
	0	0	0	0	0	0	0	0	0	0	0	0	0	0	0	0	0	0	0	0	0	0	0	0	0	0	0	0	0	0	0	0	0	0	0	0	0	0	0	0	0	0	0	0	0	0	0	0	0
	0	0	0	0	0	0	0	0	0	0	0	0	0	0	0	0	0	0	0	0	0	0	0	0	0	0	0	0	0	0	0	0	0	0	0	0	0	0	0	0	0	0	0	0	0	0	0	0	0
	0	0	0	0	0	0	0	0	0	0	0	0	0	0	0	0	0	0	0	0	0	0	0	0	0	0	0	0	0	0	0	0	0	0	0	0	0	0	0	0	0	0	0	0	0	0	0	0	0
	0	0	0	0	0	0	0	0	0	0	0	0	0	0	0	0	0	0	0	0	0	0	0	0	0	0	0	0	0	0	0	0	0	0	0	0	0	0	0	0	0	0	0	0	0	0	0	0	0
	0	0	0	0	0	0	0	0	0	0	0	0	0	0	0	0	0	0	0	0	0	0	0	0	0	0	0	0	0	0	0	0	0	0	0	0	0	0	0	0	0	0	0	0	0	0	0	0	0
	0	0	0	0	0	0	0	0	0	0	0	0	0	0	0	0	0	0	0	0	0	0	0	0	0	0	0	0	0	0	0	0	0	0	0	0	0	0	0	0	0	0	0	0	0	0	0	0	0
	0	0	0	0	0	0	0	0	0	0	0	0	0	0	0	0	0	0	0	0	0	0	0	0	0	0	0	0	0	0	0	0	0	0	0	0	0	0	0	0	0	0	0	0	0	0	0	0	0
	0	0	0	0	0	0	0	0	0	0	0	0	0	0	0	0	0	0	0	0	0	0	0	0	0	0	0	0	0	0	0	0	0	0	0	0	0	0	0	0	0	0	0	0	0	0	0	0	0
	0	0	0	0	0	0	0	0	0	0	0	0	0	0	0	0	0	0	0	0	0	0	0	0	0	0	0	0	0	0	0	0	0	0	0	0	0	0	0	0	0	0	0	0	0	0	0	0	0
	0	0	0	0	0	0	0	0	0	0	0	0	0	0	0	0	0	0	0	0	0	0	0	0	0	0	0	0	0	0	0	0	0	0	0	0	0	0	0	0	0	0	0	0	0	0	0	0	0
	0	0	0	0	0	0	0	0	0	0	0	0	0	0	0	0	0	0	0	0	0	0	0	0	0	0	0	0	0	0	0	0	0	0	0	0	0	0	0	0	0	0	0	0	0	0	0	0	0
	0	0	0	0	0	0	0	0	0	0	0	0	0	0	0	0	0	0	0	0	0	0	0	0	0	0	0	0	0	0	0	0	0	0	0	0	0	0	0	0	0	0	0	0	0	0	0	0	0
	0	0	0	0	0	0	0	0	0	0	0	0	0	0	0	0	0	0	0	0	0	0	0	0	0	0	0	0	0	0	0	0	0	0	0	0	0	0	0	0	0	0	0	0	0	0	0	0	0
	0	0	0	0	0	0	0	0	0	0	0	0	0	0	0	0	0	0	0	0	0	0	0	0	0	0	0	0	0	0	0	0	0	0	0	0	0	0	0	0	0	0	0	0	0	0	0	0	0
	0	0	0	0	0	0	0	0	0	0	0	0	0	0	0	0	0	0	0	0	0	0	0	0	0	0	0	0	0	0	0	0	0	0	0	0	0	0	0	0	0	0	0	0	0	0	0	0	0
	0	0	0	0	0	0	0	0	0	0	0	0	0	0	0	0	0	0	0	0	0	0	0	0	0	0	0	0	0	0	0	0	0	0	0	0	0	0	0	0	0	0	0	0	0	0	0	0	0
	0	0	0	0	0	0	0	0	0	0	0	0	0	0	0	0	0	0	0	0	0	0	0	0	0	0	0	0	0	0	0	0	0	0	0	0	0	0	0	0	0	0	0	0	0	0	0	0	0
magnitude of vector (vector length)	1	1	1	1	1	0.126094	1	1	1	0.330792	1	1	1	1	1	0.332822	1	0.252212	0.189208	0.055496	1	1	0.126094	1	1	1	1	1	1	1	1	1	1	1	1	0.124065	1	1	1	1	1	1	1	0.310767	1	0.172148	1	1	1
ALL POSITIVE REPORTS
feature terms at level 4 of SNOMED-CT
Case ID	T93	PW22	PW13	T138	T130	UC14	T80	T24A	T154	T36	T67	T39	T146	UC03	R07	T74	T108	T135	T124	T148	T147	T155	PW08	PW02	T13B	T33	PW14	PW19	CIR15	UC21	UC04	R13B	UC06	UC17	UC13	R26	PM32	R5	PM26	UC24	PW24	R19B	PM24	T69	T152	T149	T11B	PW18	T141
?/HCC	(+)	(+)	(+)	(+)	(+)	(+)	highly suggestive	(+)	(+)	(+)	(+)	(+)	(+)	(+)	(+)	(+)	(+)	(+)	(+)	(+)	(+)	(+)	(+)	(+)	(+)	(+)	(+)	(+)	(+)	(+)	(+)	(+)	(+)	(+)	(+)	(+)	(+)	(+)	(+)	(+)	(+)	(+)	(+)	(+)	(+)	(+)	(+)	(+)	(+)
Abdominal organ finding	0.0856364	0.114182	0	0	0	0	0	0	0	0.0856364	0.0685091	0	0	0.114182	0.0685091	0	0.0856364	0	0	0.0685091	0.0685091	0	0	0	0	0	0.114182	0	0.114182	0.0856364	0.114182	0.0856364	0.114182	0.114182	0.114182	0.0856364	0.114182	0.0856364	0.0685091	0.114182	0.114182	0.114182	0.114182	0	0.0856364	0	0.114182	0	0
Atrophy of liver	0	0	0	0	0	0	0	0	0	0	0	0	0	0	0	0	0	0	0	0	0	0	0	0	0	0	0	0	0	0	0	0	0	0	0	0	0	0	0	0	0	0	0	0	0	0	0	0	0
Blood vessel finding	0	0	0	0	0	0	0	0	0	0	0	0	0	0	0	0	0	0	0	0	0.0501304	0	0	0	0	0	0	0	0	0	0.0501304	0	0.0501304	0.0501304	0.0501304	0	0	0.0501304	0	0.0501304	0.0501304	0	0.0501304	0	0	0	0.0501304	0.0501304	0
Disorder of body cavity	0.105912	0.105912	0	0	0	0	0	0	0	0.105912	0	0.105912	0	0.105912	0.079434	0	0.105912	0.105912	0	0.105912	0.079434	0	0	0	0	0.079434	0.105912	0	0.105912	0.105912	0.105912	0.105912	0.105912	0.105912	0.105912	0.105912	0.105912	0.105912	0.079434	0.105912	0.105912	0.105912	0.105912	0.079434	0.105912	0	0.105912	0	0.105912
Disorder of body system	0.0429366	0.0429366	0	0	0	0	0	0	0	0.0429366	0	0	0	0.0429366	0.0357805	0	0.0429366	0	0	0	0.0536707	0	0	0	0	0.0357805	0.0429366	0	0.0429366	0.0429366	0.0536707	0.0429366	0.0536707	0.0536707	0.0536707	0.0429366	0.0429366	0.0429366	0	0.0536707	0.0536707	0.0429366	0.0536707	0.0357805	0.0429366	0	0.0536707	0.0536707	0
Disorder of cardiovascular system	0	0	0	0	0	0	0	0	0	0	0	0	0	0	0	0	0	0	0	0	0.022597	0	0	0	0	0	0	0	0	0	0.0376616	0	0.0376616	0.022597	0.0376616	0	0	0.022597	0	0.0376616	0.0376616	0	0.0376616	0	0	0	0.022597	0.0376616	0
Disorder of digestive system	0.0700337	0	0	0	0	0	0	0	0	0.0700337	0	0	0	0.0700337	0.0560269	0	0.0700337	0	0	0	0	0	0	0	0	0.0560269	0	0	0.0560269	0.0700337	0.0560269	0.0700337	0.0700337	0.0700337	0.0700337	0.0700337	0.0700337	0.0700337	0	0.0700337	0.0560269	0.0700337	0.0560269	0.0560269	0.0700337	0	0	0	0
Disorder of soft tissue	0	0	0	0	0	0	0	0	0	0	0	0	0	0	0	0	0	0	0	0	0.0691336	0	0	0	0	0	0	0	0	0	0.086417	0	0.086417	0.0691336	0.086417	0	0	0.086417	0.115223	0.086417	0.086417	0	0.0691336	0	0	0	0.0691336	0.0691336	0
Disorder of trunk	0.0516405	0.0516405	0	0	0	0	0	0	0	0.0516405	0	0.0516405	0	0.0516405	0.0430338	0	0.0516405	0.0516405	0	0.0516405	0.0860676	0	0	0	0	0.0430338	0.0516405	0	0.0516405	0.0516405	0.0516405	0.0516405	0.0860676	0.0860676	0.0516405	0.0516405	0.0516405	0.0516405	0.0860676	0.0516405	0.0516405	0.0516405	0.0516405	0.0430338	0.0516405	0	0.0860676	0.0516405	0.0516405
Finding of trunk structure	0.029493	0.029493	0	0	0	0	0	0	0	0.0353916	0.029493	0.029493	0	0.029493	0.0252797	0	0.0353916	0.029493	0	0.029493	0.0442394	0	0	0	0	0.0252797	0.029493	0	0.029493	0.0353916	0.029493	0.029493	0.0442394	0.0442394	0.029493	0.0353916	0.029493	0.029493	0.0442394	0.029493	0.029493	0.0353916	0.029493	0.0252797	0.029493	0	0.0442394	0.029493	0.029493
Liver finding	0.091875	0	0	0	0	0	0	0	0	0.091875	0.0689063	0	0	0.091875	0.0689063	0	0.091875	0	0	0.0689063	0.0689063	0	0	0	0	0	0	0	0.0689063	0.091875	0.0689063	0.091875	0.091875	0.091875	0.091875	0.091875	0.091875	0.091875	0.0689063	0.091875	0.0689063	0.091875	0.0689063	0	0.091875	0	0.0689063	0	0
Radiologic finding	0.0378013	0	0.0378013	0.0378013	0	0.0378013	0.0378013	0.0378013	0.0378013	0	0	0.0378013	0.0378013	0	0	0.0378013	0.0378013	0.0378013	0	0.0378013	0.0378013	0.0378013	0	0	0.0378013	0.0378013	0.0378013	0.0378013	0	0.0378013	0.0378013	0.0378013	0.0378013	0.0378013	0.0378013	0.0378013	0.0378013	0	0	0.0378013	0	0.0378013	0	0.0378013	0.0378013	0	0	0	0.0378013
Cyst of abdomen	0	0	0	0	0	0	0	0	0	0.0662931	0	0	0	0	0	0	0.0662931	0	0	0	0	0	0	0	0	0	0	0	0	0.0662931	0	0	0	0.0662931	0	0.0662931	0	0	0	0	0	0.0662931	0	0	0	0	0	0	0
Mass of body region	0	0	0	0	0	0	0	0	0	0.0867193	0.0722661	0	0	0	0	0	0.0867193	0	0	0.0722661	0	0	0	0	0	0	0	0	0	0.0867193	0.0722661	0	0.0722661	0.0867193	0	0.0867193	0	0.0722661	0.0722661	0	0	0.0867193	0	0	0	0	0	0	0
Mass of digestive structure	0	0	0	0	0	0	0	0	0	0.216798	0.144532	0	0	0	0	0	0.216798	0	0	0.144532	0	0	0	0	0	0	0	0	0	0.216798	0.144532	0	0.144532	0.216798	0	0.216798	0	0.144532	0.144532	0	0	0.216798	0	0	0	0	0	0	0
Neoplastic disease	0	0	0	0	0	0	0	0	0	0	0	0	0	0	0	0	0	0	0	0	0	0	0	0	0	0	0	0	0	0	0	0	0	0	0	0	0	0	0	0.0416667	0	0.0416667	0	0.0416667	0	0	0	0	0
Growth alteration	0	0	0	0	0	0.0680414	0	0	0	0	0.0680414	0	0	0	0	0	0	0	0	0.0680414	0	0	0	0	0	0	0	0	0	0	0	0	0	0	0	0	0	0	0.0680414	0	0	0	0.0680414	0	0	0.0680414	0	0	0
Imaging result abnormal	0	0	0	0	0	0	0	0	0	0	0	0	0	0	0	0	0.0393811	0	0	0	0	0	0	0	0	0	0	0	0	0	0	0	0.0393811	0	0.0393811	0	0.0393811	0	0	0.0393811	0	0	0	0	0	0	0	0	0
Mechanical abnormality	0	0	0	0	0	0	0	0	0	0	0	0	0	0	0	0	0	0	0	0	0	0	0	0	0	0	0	0	0	0	0	0	0.0340486	0	0	0	0.0340486	0	0	0.0340486	0	0	0	0.0340486	0	0	0	0	0
Steatosis of liver	0	0	0	0	0	0	0	0	0	0	0	0	0	0	0	0	0	0	0	0	0	0	0	0	0	0	0	0	0	0	0	0	0	0	0	0	0	0	0	0	0	0	0	0	0	0	0	0	0
Finding of biliary tract	0	0	0	0	0	0	0	0	0	0	0	0	0	0	0	0	0	0	0	0	0	0	0	0	0	0.0517668	0	0	0.0517668	0	0	0	0	0	0	0	0	0	0	0	0	0	0	0.0517668	0	0	0	0	0
Hemorrhage into peritoneal cavity	0	0	0	0	0	0	0	0	0	0	0	0	0	0	0	0	0	0	0	0	0	0	0	0	0	0	0	0	0	0	0	0	0	0	0	0	0	0	0.126762	0	0	0	0	0.253524	0	0	0	0	0
Disorder of connective tissue	0	0	0	0	0	0	0	0	0	0	0	0	0	0	0	0	0	0	0	0	0	0	0	0	0	0	0	0	0	0	0	0	0	0	0	0	0	0	0.126745	0	0	0	0	0.25349	0	0	0	0	0
Nontraumatic hemoperitoneum	0	0	0	0	0	0	0	0	0	0	0	0	0	0	0	0	0	0	0	0	0	0	0	0	0	0	0	0	0	0	0	0	0	0	0	0	0	0	0.25349	0	0	0	0	0.25349	0	0	0	0	0
Degenerative abnormality	0	0	0	0	0	0	0	0	0	0	0	0	0	0	0	0	0	0	0	0	0	0	0	0	0	0	0	0	0	0	0	0	0	0	0	0	0	0	0	0	0	0	0	0.240168	0	0	0	0	0
Mass	0	0	0	0	0	0	0	0	0	0	0	0	0	0	0	0	0	0	0	0	0	0	0	0	0	0	0	0	0	0	0	0	0	0	0	0	0	0	0	0	0	0	0	0.962408	0	0	0	0	0
Traumatic and/or non-traumatic injury of anatomical site	0	0	0	0	0	0	0	0	0	0	0	0	0	0.0525496	0	0	0	0	0	0	0	0	0	0	0	0	0	0	0	0	0	0	0	0	0	0	0	0	0	0	0	0	0	0.157649	0.0525496	0	0	0	0
Abnormal radiologic density, diffuse	0	0	0	0	0	0	0	0	0	0	0	0	0	0	0	0.137509	0	0	0	0	0	0	0	0	0	0	0	0	0	0	0	0	0.137509	0	0	0	0	0	0	0	0	0	0	0.137509	0	0	0	0	0
Imaging result abnormal	0	0	0	0.0353529	0	0.0353529	0	0	0	0	0	0.0353529	0	0	0	0.0353529	0	0	0	0	0	0	0	0	0	0	0	0	0	0	0	0	0.0353529	0	0	0	0	0	0	0	0	0	0	0.141412	0	0	0	0	0
Abnormal radiologic density, irregular	0	0	0	0	0	0	0	0	0	0	0	0.141421	0	0	0	0	0	0	0	0	0	0	0	0	0	0	0	0	0	0	0	0	0	0	0	0	0	0	0	0	0	0	0	0.141421	0	0	0	0	0
Abnormal radiologic density, nodular	0	0	0	0	0	0.208077	0	0	0	0	0	0	0	0	0	0.208077	0	0	0	0	0	0	0	0	0	0	0	0	0	0	0	0	0	0	0	0	0	0	0	0	0	0	0	0.208077	0	0	0	0	0
Abnormal radiologic density, small area	0	0	0	0	0	0	0	0	0	0	0	0	0	0	0	0.126323	0	0	0	0	0	0	0	0	0	0	0	0	0	0	0	0	0	0	0	0	0	0	0	0	0	0	0	0.126323	0	0	0	0	0
Multiple lesions	0	0	0	0	0	0	0	0	0	0	0	0	0	0	0	0.162426	0	0	0	0	0	0	0	0	0	0	0	0	0	0	0	0	0.162426	0	0	0	0	0	0.162426	0	0	0	0	0.162426	0	0	0	0	0
Finding of number of lesions	0	0	0	0	0	0	0	0	0	0	0	0	0	0	0	0.0888937	0	0	0	0	0	0	0.0888937	0	0	0	0	0	0	0	0.0888937	0.0888937	0.0888937	0	0	0	0.0888937	0	0.0888937	0	0	0	0	0.177787	0	0	0.0888937	0	0
Heterotopia	0	0	0	0	0	0	0	0	0	0	0	0	0	0	0	0	0	0	0	0	0	0	0	0	0	0	0	0	0	0	0	0	0	0	0	0	0	0	0	0	0	0	0	0	0	0	0	0	0
Degenerative abnormality	0	0	0	0	0	0	0	0	0	0	0	0	0	0	0	0	0	0	0	0	0	0	0	0	0	0	0	0	0	0	0	0	0	0	0	0	0	0	0	0	0	0	0	0	0	0	0	0	0
constant	1e-08	1e-05	0.1	0.01	1	0.0001	0.1	0.1	0.1	1e-10	1e-06	1e-06	0.1	1e-08	1e-07	1e-07	1e-12	0.0001	1	1e-09	1e-10	0.1	0.1	1	0.1	1e-07	1e-06	0.1	1e-08	1e-11	1e-14	1e-09	1e-19	1e-14	1e-12	1e-11	1e-11	1e-12	1e-14	1e-14	1e-10	1e-12	1e-11	1e-22	1e-09	0.1	1e-10	1e-06	0.0001
	0	0	0	0	0	0	0	0	0	0	0	0	0	0	0	0	0	0	0	0	0	0	0	0	0	0	0	0	0	0	0	0	0	0	0	0	0	0	0	0	0	0	0	0	0	0	0	0	0
	0	0	0	0	0	0	0	0	0	0	0	0	0	0	0	0	0	0	0	0	0	0	0	0	0	0	0	0	0	0	0	0	0	0	0	0	0	0	0	0	0	0	0	0	0	0	0	0	0
	0	0	0	0	0	0	0	0	0	0	0	0	0	0	0	0	0	0	0	0	0	0	0	0	0	0	0	0	0	0	0	0	0	0	0	0	0	0	0	0	0	0	0	0	0	0	0	0	0
	0	0	0	0	0	0	0	0	0	0	0	0	0	0	0	0	0	0	0	0	0	0	0	0	0	0	0	0	0	0	0	0	0	0	0	0	0	0	0	0	0	0	0	0	0	0	0	0	0
	0	0	0	0	0	0	0	0	0	0	0	0	0	0	0	0	0	0	0	0	0	0	0	0	0	0	0	0	0	0	0	0	0	0	0	0	0	0	0	0	0	0	0	0	0	0	0	0	0
	0	0	0	0	0	0	0	0	0	0	0	0	0	0	0	0	0	0	0	0	0	0	0	0	0	0	0	0	0	0	0	0	0	0	0	0	0	0	0	0	0	0	0	0	0	0	0	0	0
	0	0	0	0	0	0	0	0	0	0	0	0	0	0	0	0	0	0	0	0	0	0	0	0	0	0	0	0	0	0	0	0	0	0	0	0	0	0	0	0	0	0	0	0	0	0	0	0	0
	0	0	0	0	0	0	0	0	0	0	0	0	0	0	0	0	0	0	0	0	0	0	0	0	0	0	0	0	0	0	0	0	0	0	0	0	0	0	0	0	0	0	0	0	0	0	0	0	0
	0	0	0	0	0	0	0	0	0	0	0	0	0	0	0	0	0	0	0	0	0	0	0	0	0	0	0	0	0	0	0	0	0	0	0	0	0	0	0	0	0	0	0	0	0	0	0	0	0
	0	0	0	0	0	0	0	0	0	0	0	0	0	0	0	0	0	0	0	0	0	0	0	0	0	0	0	0	0	0	0	0	0	0	0	0	0	0	0	0	0	0	0	0	0	0	0	0	0
	0	0	0	0	0	0	0	0	0	0	0	0	0	0	0	0	0	0	0	0	0	0	0	0	0	0	0	0	0	0	0	0	0	0	0	0	0	0	0	0	0	0	0	0	0	0	0	0	0
	0	0	0	0	0	0	0	0	0	0	0	0	0	0	0	0	0	0	0	0	0	0	0	0	0	0	0	0	0	0	0	0	0	0	0	0	0	0	0	0	0	0	0	0	0	0	0	0	0
	0	0	0	0	0	0	0	0	0	0	0	0	0	0	0	0	0	0	0	0	0	0	0	0	0	0	0	0	0	0	0	0	0	0	0	0	0	0	0	0	0	0	0	0	0	0	0	0	0
	0	0	0	0	0	0	0	0	0	0	0	0	0	0	0	0	0	0	0	0	0	0	0	0	0	0	0	0	0	0	0	0	0	0	0	0	0	0	0	0	0	0	0	0	0	0	0	0	0
	0	0	0	0	0	0	0	0	0	0	0	0	0	0	0	0	0	0	0	0	0	0	0	0	0	0	0	0	0	0	0	0	0	0	0	0	0	0	0	0	0	0	0	0	0	0	0	0	0
	0	0	0	0	0	0	0	0	0	0	0	0	0	0	0	0	0	0	0	0	0	0	0	0	0	0	0	0	0	0	0	0	0	0	0	0	0	0	0	0	0	0	0	0	0	0	0	0	0
	0	0	0	0	0	0	0	0	0	0	0	0	0	0	0	0	0	0	0	0	0	0	0	0	0	0	0	0	0	0	0	0	0	0	0	0	0	0	0	0	0	0	0	0	0	0	0	0	0
	0	0	0	0	0	0	0	0	0	0	0	0	0	0	0	0	0	0	0	0	0	0	0	0	0	0	0	0	0	0	0	0	0	0	0	0	0	0	0	0	0	0	0	0	0	0	0	0	0
	0	0	0	0	0	0	0	0	0	0	0	0	0	0	0	0	0	0	0	0	0	0	0	0	0	0	0	0	0	0	0	0	0	0	0	0	0	0	0	0	0	0	0	0	0	0	0	0	0
	0	0	0	0	0	0	0	0	0	0	0	0	0	0	0	0	0	0	0	0	0	0	0	0	0	0	0	0	0	0	0	0	0	0	0	0	0	0	0	0	0	0	0	0	0	0	0	0	0
	0	0	0	0	0	0	0	0	0	0	0	0	0	0	0	0	0	0	0	0	0	0	0	0	0	0	0	0	0	0	0	0	0	0	0	0	0	0	0	0	0	0	0	0	0	0	0	0	0
	0	0	0	0	0	0	0	0	0	0	0	0	0	0	0	0	0	0	0	0	0	0	0	0	0	0	0	0	0	0	0	0	0	0	0	0	0	0	0	0	0	0	0	0	0	0	0	0	0
magnitude of vector (vector length)	0.196738	0.172148	0.106906	0.052714	1	0.224954	0.106906	0.106906	0.106906	0.310767	0.202615	0.193475	0.106906	0.213874	0.150538	0.339301	0.315525	0.127212	1	0.237415	0.192947	0.106906	0.133799	1	0.106906	0.131639	0.17625	0.106906	0.200504	0.313057	0.292235	0.215889	0.38202	0.343503	0.241654	0.313057	0.234568	0.271809	0.446999	0.247573	0.223514	0.324723	0.227815	1.18234	0.203635	0.120953	0.238649	0.122996	0.127212
similarity score
negative\positive	T93	PW22	PW13	T138	T130	UC14	T80	T24A	T154	T36	T67	T39	T146	UC03	R07	T74	T108	T135	T124	T148	T147	T155	PW08	PW02	T13B	T33	PW14	PW19	CIR15	UC21	UC04	R13B	UC06	UC17	UC13	R26	PM32	R5	PM26	UC24	PW24	R19B	PM24	T69	T152	T149	T11B	PW18	T141
T17A	5.08291e-08	5.80895e-05	0.935399	0.189703	1	0.000444534	0.935399	0.935399	0.935399	3.21785e-10	4.93546e-06	5.16862e-06	0.935399	4.67565e-08	6.64286e-07	2.94723e-07	3.16932e-12	0.00078609	1	4.21203e-09	5.18276e-10	0.935399	0.747391	1	0.935399	7.59655e-07	5.67377e-06	0.935399	4.98743e-08	3.1943e-11	3.4219e-14	4.63202e-09	2.61766e-19	2.91118e-14	4.13814e-12	3.1943e-11	4.26316e-11	3.67905e-12	2.23714e-14	4.03922e-14	4.474e-10	3.07955e-12	4.38953e-11	8.45781e-23	4.91075e-09	0.826767	4.19025e-10	8.13034e-06	0.00078609
T08	5.08291e-08	5.80895e-05	0.935399	0.189703	1	0.000444534	0.935399	0.935399	0.935399	3.21785e-10	4.93546e-06	5.16862e-06	0.935399	4.67565e-08	6.64286e-07	2.94723e-07	3.16932e-12	0.00078609	1	4.21203e-09	5.18276e-10	0.935399	0.747391	1	0.935399	7.59655e-07	5.67377e-06	0.935399	4.98743e-08	3.1943e-11	3.4219e-14	4.63202e-09	2.61766e-19	2.91118e-14	4.13814e-12	3.1943e-11	4.26316e-11	3.67905e-12	2.23714e-14	4.03922e-14	4.474e-10	3.07955e-12	4.38953e-11	8.45781e-23	4.91075e-09	0.826767	4.19025e-10	8.13034e-06	0.00078609
T07	5.08291e-08	5.80895e-05	0.935399	0.189703	1	0.000444534	0.935399	0.935399	0.935399	3.21785e-10	4.93546e-06	5.16862e-06	0.935399	4.67565e-08	6.64286e-07	2.94723e-07	3.16932e-12	0.00078609	1	4.21203e-09	5.18276e-10	0.935399	0.747391	1	0.935399	7.59655e-07	5.67377e-06	0.935399	4.98743e-08	3.1943e-11	3.4219e-14	4.63202e-09	2.61766e-19	2.91118e-14	4.13814e-12	3.1943e-11	4.26316e-11	3.67905e-12	2.23714e-14	4.03922e-14	4.474e-10	3.07955e-12	4.38953e-11	8.45781e-23	4.91075e-09	0.826767	4.19025e-10	8.13034e-06	0.00078609
T19A	5.08291e-08	5.80895e-05	0.935399	0.189703	1	0.000444534	0.935399	0.935399	0.935399	3.21785e-10	4.93546e-06	5.16862e-06	0.935399	4.67565e-08	6.64286e-07	2.94723e-07	3.16932e-12	0.00078609	1	4.21203e-09	5.18276e-10	0.935399	0.747391	1	0.935399	7.59655e-07	5.67377e-06	0.935399	4.98743e-08	3.1943e-11	3.4219e-14	4.63202e-09	2.61766e-19	2.91118e-14	4.13814e-12	3.1943e-11	4.26316e-11	3.67905e-12	2.23714e-14	4.03922e-14	4.474e-10	3.07955e-12	4.38953e-11	8.45781e-23	4.91075e-09	0.826767	4.19025e-10	8.13034e-06	0.00078609
T06	5.08291e-08	5.80895e-05	0.935399	0.189703	1	0.000444534	0.935399	0.935399	0.935399	3.21785e-10	4.93546e-06	5.16862e-06	0.935399	4.67565e-08	6.64286e-07	2.94723e-07	3.16932e-12	0.00078609	1	4.21203e-09	5.18276e-10	0.935399	0.747391	1	0.935399	7.59655e-07	5.67377e-06	0.935399	4.98743e-08	3.1943e-11	3.4219e-14	4.63202e-09	2.61766e-19	2.91118e-14	4.13814e-12	3.1943e-11	4.26316e-11	3.67905e-12	2.23714e-14	4.03922e-14	4.474e-10	3.07955e-12	4.38953e-11	8.45781e-23	4.91075e-09	0.826767	4.19025e-10	8.13034e-06	0.00078609
T02	0.678864	0.595072	7.41825e-06	1.50445e-06	7.93057e-06	3.52541e-09	7.41825e-06	7.41825e-06	7.41825e-06	0.433575	0.0291825	0.466503	7.41825e-06	0.624471	0.696451	2.33732e-12	0.427037	0.709499	7.93057e-06	0.380164	0.536478	7.41825e-06	5.92724e-06	7.93057e-06	7.41825e-06	0.957883	0.581224	7.41825e-06	0.741068	0.430403	0.446149	0.618644	0.396078	0.44049	0.565287	0.430403	0.569381	0.491367	0.1975	0.551773	0.583322	0.414941	0.572309	0.106648	0.655871	6.55673e-06	0.503635	0.315184	0.709499
T160	5.08291e-08	5.80895e-05	0.935399	0.189703	1	0.000444534	0.935399	0.935399	0.935399	3.21785e-10	4.93546e-06	5.16862e-06	0.935399	4.67565e-08	6.64286e-07	2.94723e-07	3.16932e-12	0.00078609	1	4.21203e-09	5.18276e-10	0.935399	0.747391	1	0.935399	7.59655e-07	5.67377e-06	0.935399	4.98743e-08	3.1943e-11	3.4219e-14	4.63202e-09	2.61766e-19	2.91118e-14	4.13814e-12	3.1943e-11	4.26316e-11	3.67905e-12	2.23714e-14	4.03922e-14	4.474e-10	3.07955e-12	4.38953e-11	8.45781e-23	4.91075e-09	0.826767	4.19025e-10	8.13034e-06	0.00078609
T134	5.08291e-08	5.80895e-05	0.935399	0.189703	1	0.000444534	0.935399	0.935399	0.935399	3.21785e-10	4.93546e-06	5.16862e-06	0.935399	4.67565e-08	6.64286e-07	2.94723e-07	3.16932e-12	0.00078609	1	4.21203e-09	5.18276e-10	0.935399	0.747391	1	0.935399	7.59655e-07	5.67377e-06	0.935399	4.98743e-08	3.1943e-11	3.4219e-14	4.63202e-09	2.61766e-19	2.91118e-14	4.13814e-12	3.1943e-11	4.26316e-11	3.67905e-12	2.23714e-14	4.03922e-14	4.474e-10	3.07955e-12	4.38953e-11	8.45781e-23	4.91075e-09	0.826767	4.19025e-10	8.13034e-06	0.00078609
T20A	5.08291e-08	5.80895e-05	0.935399	0.189703	1	0.000444534	0.935399	0.935399	0.935399	3.21785e-10	4.93546e-06	5.16862e-06	0.935399	4.67565e-08	6.64286e-07	2.94723e-07	3.16932e-12	0.00078609	1	4.21203e-09	5.18276e-10	0.935399	0.747391	1	0.935399	7.59655e-07	5.67377e-06	0.935399	4.98743e-08	3.1943e-11	3.4219e-14	4.63202e-09	2.61766e-19	2.91118e-14	4.13814e-12	3.1943e-11	4.26316e-11	3.67905e-12	2.23714e-14	4.03922e-14	4.474e-10	3.07955e-12	4.38953e-11	8.45781e-23	4.91075e-09	0.826767	4.19025e-10	8.13034e-06	0.00078609
PM09	1.53659e-09	1.75607e-06	0.0282776	0.00573481	0.0302305	1.34385e-05	0.0282776	0.0282776	0.0282776	9.7277e-12	1.49201e-07	1.5625e-07	0.0282776	1.41347e-09	2.00817e-08	8.90962e-09	9.58102e-14	2.37639e-05	0.0302305	1.27332e-10	1.56677e-11	0.0282776	0.022594	0.0302305	0.0282776	2.29647e-08	1.71521e-07	0.0282776	1.50772e-09	9.65653e-13	1.03446e-15	1.40028e-10	7.91332e-21	8.80064e-16	1.25098e-13	9.65653e-13	1.28877e-12	1.11219e-13	6.76298e-16	1.22107e-15	1.35251e-11	9.30962e-14	1.32698e-12	0.838566	1.48454e-10	0.0249936	1.26673e-11	2.45784e-07	2.37639e-05
PW16	5.08291e-08	5.80895e-05	0.935399	0.189703	1	0.000444534	0.935399	0.935399	0.935399	3.21785e-10	4.93546e-06	5.16862e-06	0.935399	4.67565e-08	6.64286e-07	2.94723e-07	3.16932e-12	0.00078609	1	4.21203e-09	5.18276e-10	0.935399	0.747391	1	0.935399	7.59655e-07	5.67377e-06	0.935399	4.98743e-08	3.1943e-11	3.4219e-14	4.63202e-09	2.61766e-19	2.91118e-14	4.13814e-12	3.1943e-11	4.26316e-11	3.67905e-12	2.23714e-14	4.03922e-14	4.474e-10	3.07955e-12	4.38953e-11	8.45781e-23	4.91075e-09	0.826767	4.19025e-10	8.13034e-06	0.00078609
T161	5.08291e-08	5.80895e-05	0.935399	0.189703	1	0.000444534	0.935399	0.935399	0.935399	3.21785e-10	4.93546e-06	5.16862e-06	0.935399	4.67565e-08	6.64286e-07	2.94723e-07	3.16932e-12	0.00078609	1	4.21203e-09	5.18276e-10	0.935399	0.747391	1	0.935399	7.59655e-07	5.67377e-06	0.935399	4.98743e-08	3.1943e-11	3.4219e-14	4.63202e-09	2.61766e-19	2.91118e-14	4.13814e-12	3.1943e-11	4.26316e-11	3.67905e-12	2.23714e-14	4.03922e-14	4.474e-10	3.07955e-12	4.38953e-11	8.45781e-23	4.91075e-09	0.826767	4.19025e-10	8.13034e-06	0.00078609
PM12	5.08291e-08	5.80895e-05	0.935399	0.189703	1	0.000444534	0.935399	0.935399	0.935399	3.21785e-10	4.93546e-06	5.16862e-06	0.935399	4.67565e-08	6.64286e-07	2.94723e-07	3.16932e-12	0.00078609	1	4.21203e-09	5.18276e-10	0.935399	0.747391	1	0.935399	7.59655e-07	5.67377e-06	0.935399	4.98743e-08	3.1943e-11	3.4219e-14	4.63202e-09	2.61766e-19	2.91118e-14	4.13814e-12	3.1943e-11	4.26316e-11	3.67905e-12	2.23714e-14	4.03922e-14	4.474e-10	3.07955e-12	4.38953e-11	8.45781e-23	4.91075e-09	0.826767	4.19025e-10	8.13034e-06	0.00078609
T8	5.08291e-08	5.80895e-05	0.935399	0.189703	1	0.000444534	0.935399	0.935399	0.935399	3.21785e-10	4.93546e-06	5.16862e-06	0.935399	4.67565e-08	6.64286e-07	2.94723e-07	3.16932e-12	0.00078609	1	4.21203e-09	5.18276e-10	0.935399	0.747391	1	0.935399	7.59655e-07	5.67377e-06	0.935399	4.98743e-08	3.1943e-11	3.4219e-14	4.63202e-09	2.61766e-19	2.91118e-14	4.13814e-12	3.1943e-11	4.26316e-11	3.67905e-12	2.23714e-14	4.03922e-14	4.474e-10	3.07955e-12	4.38953e-11	8.45781e-23	4.91075e-09	0.826767	4.19025e-10	8.13034e-06	0.00078609
PW04	5.08291e-08	5.80895e-05	0.935399	0.189703	1	0.000444534	0.935399	0.935399	0.935399	3.21785e-10	4.93546e-06	5.16862e-06	0.935399	4.67565e-08	6.64286e-07	2.94723e-07	3.16932e-12	0.00078609	1	4.21203e-09	5.18276e-10	0.935399	0.747391	1	0.935399	7.59655e-07	5.67377e-06	0.935399	4.98743e-08	3.1943e-11	3.4219e-14	4.63202e-09	2.61766e-19	2.91118e-14	4.13814e-12	3.1943e-11	4.26316e-11	3.67905e-12	2.23714e-14	4.03922e-14	4.474e-10	3.07955e-12	4.38953e-11	8.45781e-23	4.91075e-09	0.826767	4.19025e-10	8.13034e-06	0.00078609
T157	0.593777	0.463386	0.0401605	0.0814471	3.00461e-12	0.0190857	0.0401605	0.0401605	0.0401605	0.933733	0.753952	0.254016	0.0401605	0.560468	0.582563	0.0126537	0.93326	0.386331	3.00461e-12	0.837233	0.51244	0.0401605	2.24562e-12	3.00461e-12	0.0401605	0.420407	0.476962	0.0401605	0.55152	0.940615	0.828176	0.541105	0.675933	0.923281	0.572442	0.940615	0.529328	0.857854	0.431684	0.558757	0.55814	0.929443	0.547602	0.0468071	0.573665	2.48411e-12	0.480866	0.250885	0.386331
T20B	5.08291e-08	5.80895e-05	0.935399	0.189703	1	0.000444534	0.935399	0.935399	0.935399	3.21785e-10	4.93546e-06	5.16862e-06	0.935399	4.67565e-08	6.64286e-07	2.94723e-07	3.16932e-12	0.00078609	1	4.21203e-09	5.18276e-10	0.935399	0.747391	1	0.935399	7.59655e-07	5.67377e-06	0.935399	4.98743e-08	3.1943e-11	3.4219e-14	4.63202e-09	2.61766e-19	2.91118e-14	4.13814e-12	3.1943e-11	4.26316e-11	3.67905e-12	2.23714e-14	4.03922e-14	4.474e-10	3.07955e-12	4.38953e-11	8.45781e-23	4.91075e-09	0.826767	4.19025e-10	8.13034e-06	0.00078609
T121	0.368199	0.297509	0.0529963	0.201485	3.96492e-10	0.810327	0.0529963	0.0529963	0.0529963	0.216768	0.0145899	0.288127	0.0529963	0.312207	0.348194	0.537241	0.231455	0.399254	3.96492e-10	0.213929	0.297578	0.0529963	2.96335e-10	3.96492e-10	0.0529963	0.521937	0.322731	0.0529963	0.3705	0.233279	0.242442	0.335537	0.225824	0.236719	0.306063	0.233279	0.308818	0.245661	0.0987412	0.32655	0.291635	0.246097	0.286129	0.22589	0.355728	3.27807e-10	0.251795	0.157578	0.399254
T139	0.770043	0.745714	4.94375e-09	1.00261e-09	5.28518e-09	2.34945e-12	4.94375e-09	4.94375e-09	4.94375e-09	0.491931	0.280316	0.386874	4.94375e-09	0.756671	0.789731	1.55767e-15	0.484513	0.588392	5.28518e-09	0.525455	0.980621	4.94375e-09	3.9501e-09	5.28518e-09	4.94375e-09	0.524039	0.72836	4.94375e-09	0.765409	0.488331	0.704459	0.701736	0.610808	0.655675	0.886524	0.488331	0.689918	0.732325	0.39115	0.865331	0.921051	0.502618	0.875942	0.0583451	0.743962	4.36962e-09	0.908705	0.72076	0.588392
T139	0.130877	1.04673e-05	0.409404	0.52264	0.180193	0.114541	0.409404	0.409404	0.409404	5.79834e-11	8.89336e-07	0.133085	0.409404	8.42519e-09	1.197e-07	0.0758869	0.170174	0.202548	0.180193	0.108453	0.133448	0.409404	0.134675	0.180193	0.409404	0.1956	0.146092	0.409404	8.98701e-09	0.0822485	0.0881088	0.119268	0.140553	0.0749585	0.222194	0.0822485	0.228907	6.62939e-13	4.03117e-15	0.216882	8.06183e-11	0.0792938	7.90963e-12	0.0217776	0.126444	0.148978	7.55054e-11	1.46503e-06	0.202548
T129	5.08291e-08	5.80895e-05	0.935399	0.189703	1	0.000444534	0.935399	0.935399	0.935399	3.21785e-10	4.93546e-06	5.16862e-06	0.935399	4.67565e-08	6.64286e-07	2.94723e-07	3.16932e-12	0.00078609	1	4.21203e-09	5.18276e-10	0.935399	0.747391	1	0.935399	7.59655e-07	5.67377e-06	0.935399	4.98743e-08	3.1943e-11	3.4219e-14	4.63202e-09	2.61766e-19	2.91118e-14	4.13814e-12	3.1943e-11	4.26316e-11	3.67905e-12	2.23714e-14	4.03922e-14	4.474e-10	3.07955e-12	4.38953e-11	8.45781e-23	4.91075e-09	0.826767	4.19025e-10	8.13034e-06	0.00078609
T35	5.08291e-08	5.80895e-05	0.935399	0.189703	1	0.000444534	0.935399	0.935399	0.935399	3.21785e-10	4.93546e-06	5.16862e-06	0.935399	4.67565e-08	6.64286e-07	2.94723e-07	3.16932e-12	0.00078609	1	4.21203e-09	5.18276e-10	0.935399	0.747391	1	0.935399	7.59655e-07	5.67377e-06	0.935399	4.98743e-08	3.1943e-11	3.4219e-14	4.63202e-09	2.61766e-19	2.91118e-14	4.13814e-12	3.1943e-11	4.26316e-11	3.67905e-12	2.23714e-14	4.03922e-14	4.474e-10	3.07955e-12	4.38953e-11	8.45781e-23	4.91075e-09	0.826767	4.19025e-10	8.13034e-06	0.00078609
T46	0.678864	0.595072	7.41825e-06	1.50445e-06	7.93057e-06	3.52541e-09	7.41825e-06	7.41825e-06	7.41825e-06	0.433575	0.0291825	0.466503	7.41825e-06	0.624471	0.696451	2.33732e-12	0.427037	0.709499	7.93057e-06	0.380164	0.536478	7.41825e-06	5.92724e-06	7.93057e-06	7.41825e-06	0.957883	0.581224	7.41825e-06	0.741068	0.430403	0.446149	0.618644	0.396078	0.44049	0.565287	0.430403	0.569381	0.491367	0.1975	0.551773	0.583322	0.414941	0.572309	0.106648	0.655871	6.55673e-06	0.503635	0.315184	0.709499
T78	5.08291e-08	5.80895e-05	0.935399	0.189703	1	0.000444534	0.935399	0.935399	0.935399	3.21785e-10	4.93546e-06	5.16862e-06	0.935399	4.67565e-08	6.64286e-07	2.94723e-07	3.16932e-12	0.00078609	1	4.21203e-09	5.18276e-10	0.935399	0.747391	1	0.935399	7.59655e-07	5.67377e-06	0.935399	4.98743e-08	3.1943e-11	3.4219e-14	4.63202e-09	2.61766e-19	2.91118e-14	4.13814e-12	3.1943e-11	4.26316e-11	3.67905e-12	2.23714e-14	4.03922e-14	4.474e-10	3.07955e-12	4.38953e-11	8.45781e-23	4.91075e-09	0.826767	4.19025e-10	8.13034e-06	0.00078609
T66	5.08291e-08	5.80895e-05	0.935399	0.189703	1	0.000444534	0.935399	0.935399	0.935399	3.21785e-10	4.93546e-06	5.16862e-06	0.935399	4.67565e-08	6.64286e-07	2.94723e-07	3.16932e-12	0.00078609	1	4.21203e-09	5.18276e-10	0.935399	0.747391	1	0.935399	7.59655e-07	5.67377e-06	0.935399	4.98743e-08	3.1943e-11	3.4219e-14	4.63202e-09	2.61766e-19	2.91118e-14	4.13814e-12	3.1943e-11	4.26316e-11	3.67905e-12	2.23714e-14	4.03922e-14	4.474e-10	3.07955e-12	4.38953e-11	8.45781e-23	4.91075e-09	0.826767	4.19025e-10	8.13034e-06	0.00078609
T17B	5.08291e-08	5.80895e-05	0.935399	0.189703	1	0.000444534	0.935399	0.935399	0.935399	3.21785e-10	4.93546e-06	5.16862e-06	0.935399	4.67565e-08	6.64286e-07	2.94723e-07	3.16932e-12	0.00078609	1	4.21203e-09	5.18276e-10	0.935399	0.747391	1	0.935399	7.59655e-07	5.67377e-06	0.935399	4.98743e-08	3.1943e-11	3.4219e-14	4.63202e-09	2.61766e-19	2.91118e-14	4.13814e-12	3.1943e-11	4.26316e-11	3.67905e-12	2.23714e-14	4.03922e-14	4.474e-10	3.07955e-12	4.38953e-11	8.45781e-23	4.91075e-09	0.826767	4.19025e-10	8.13034e-06	0.00078609
T91	5.08291e-08	5.80895e-05	0.935399	0.189703	1	0.000444534	0.935399	0.935399	0.935399	3.21785e-10	4.93546e-06	5.16862e-06	0.935399	4.67565e-08	6.64286e-07	2.94723e-07	3.16932e-12	0.00078609	1	4.21203e-09	5.18276e-10	0.935399	0.747391	1	0.935399	7.59655e-07	5.67377e-06	0.935399	4.98743e-08	3.1943e-11	3.4219e-14	4.63202e-09	2.61766e-19	2.91118e-14	4.13814e-12	3.1943e-11	4.26316e-11	3.67905e-12	2.23714e-14	4.03922e-14	4.474e-10	3.07955e-12	4.38953e-11	8.45781e-23	4.91075e-09	0.826767	4.19025e-10	8.13034e-06	0.00078609
T58	5.08291e-08	5.80895e-05	0.935399	0.189703	1	0.000444534	0.935399	0.935399	0.935399	3.21785e-10	4.93546e-06	5.16862e-06	0.935399	4.67565e-08	6.64286e-07	2.94723e-07	3.16932e-12	0.00078609	1	4.21203e-09	5.18276e-10	0.935399	0.747391	1	0.935399	7.59655e-07	5.67377e-06	0.935399	4.98743e-08	3.1943e-11	3.4219e-14	4.63202e-09	2.61766e-19	2.91118e-14	4.13814e-12	3.1943e-11	4.26316e-11	3.67905e-12	2.23714e-14	4.03922e-14	4.474e-10	3.07955e-12	4.38953e-11	8.45781e-23	4.91075e-09	0.826767	4.19025e-10	8.13034e-06	0.00078609
T47	5.08291e-08	5.80895e-05	0.935399	0.189703	1	0.000444534	0.935399	0.935399	0.935399	3.21785e-10	4.93546e-06	5.16862e-06	0.935399	4.67565e-08	6.64286e-07	2.94723e-07	3.16932e-12	0.00078609	1	4.21203e-09	5.18276e-10	0.935399	0.747391	1	0.935399	7.59655e-07	5.67377e-06	0.935399	4.98743e-08	3.1943e-11	3.4219e-14	4.63202e-09	2.61766e-19	2.91118e-14	4.13814e-12	3.1943e-11	4.26316e-11	3.67905e-12	2.23714e-14	4.03922e-14	4.474e-10	3.07955e-12	4.38953e-11	8.45781e-23	4.91075e-09	0.826767	4.19025e-10	8.13034e-06	0.00078609
T48	5.08291e-08	5.80895e-05	0.935399	0.189703	1	0.000444534	0.935399	0.935399	0.935399	3.21785e-10	4.93546e-06	5.16862e-06	0.935399	4.67565e-08	6.64286e-07	2.94723e-07	3.16932e-12	0.00078609	1	4.21203e-09	5.18276e-10	0.935399	0.747391	1	0.935399	7.59655e-07	5.67377e-06	0.935399	4.98743e-08	3.1943e-11	3.4219e-14	4.63202e-09	2.61766e-19	2.91118e-14	4.13814e-12	3.1943e-11	4.26316e-11	3.67905e-12	2.23714e-14	4.03922e-14	4.474e-10	3.07955e-12	4.38953e-11	8.45781e-23	4.91075e-09	0.826767	4.19025e-10	8.13034e-06	0.00078609
T97	5.08291e-08	5.80895e-05	0.935399	0.189703	1	0.000444534	0.935399	0.935399	0.935399	3.21785e-10	4.93546e-06	5.16862e-06	0.935399	4.67565e-08	6.64286e-07	2.94723e-07	3.16932e-12	0.00078609	1	4.21203e-09	5.18276e-10	0.935399	0.747391	1	0.935399	7.59655e-07	5.67377e-06	0.935399	4.98743e-08	3.1943e-11	3.4219e-14	4.63202e-09	2.61766e-19	2.91118e-14	4.13814e-12	3.1943e-11	4.26316e-11	3.67905e-12	2.23714e-14	4.03922e-14	4.474e-10	3.07955e-12	4.38953e-11	8.45781e-23	4.91075e-09	0.826767	4.19025e-10	8.13034e-06	0.00078609
T90	5.08291e-08	5.80895e-05	0.935399	0.189703	1	0.000444534	0.935399	0.935399	0.935399	3.21785e-10	4.93546e-06	5.16862e-06	0.935399	4.67565e-08	6.64286e-07	2.94723e-07	3.16932e-12	0.00078609	1	4.21203e-09	5.18276e-10	0.935399	0.747391	1	0.935399	7.59655e-07	5.67377e-06	0.935399	4.98743e-08	3.1943e-11	3.4219e-14	4.63202e-09	2.61766e-19	2.91118e-14	4.13814e-12	3.1943e-11	4.26316e-11	3.67905e-12	2.23714e-14	4.03922e-14	4.474e-10	3.07955e-12	4.38953e-11	8.45781e-23	4.91075e-09	0.826767	4.19025e-10	8.13034e-06	0.00078609
T96	5.08291e-08	5.80895e-05	0.935399	0.189703	1	0.000444534	0.935399	0.935399	0.935399	3.21785e-10	4.93546e-06	5.16862e-06	0.935399	4.67565e-08	6.64286e-07	2.94723e-07	3.16932e-12	0.00078609	1	4.21203e-09	5.18276e-10	0.935399	0.747391	1	0.935399	7.59655e-07	5.67377e-06	0.935399	4.98743e-08	3.1943e-11	3.4219e-14	4.63202e-09	2.61766e-19	2.91118e-14	4.13814e-12	3.1943e-11	4.26316e-11	3.67905e-12	2.23714e-14	4.03922e-14	4.474e-10	3.07955e-12	4.38953e-11	8.45781e-23	4.91075e-09	0.826767	4.19025e-10	8.13034e-06	0.00078609
T95	5.08291e-08	5.80895e-05	0.935399	0.189703	1	0.000444534	0.935399	0.935399	0.935399	3.21785e-10	4.93546e-06	5.16862e-06	0.935399	4.67565e-08	6.64286e-07	2.94723e-07	3.16932e-12	0.00078609	1	4.21203e-09	5.18276e-10	0.935399	0.747391	1	0.935399	7.59655e-07	5.67377e-06	0.935399	4.98743e-08	3.1943e-11	3.4219e-14	4.63202e-09	2.61766e-19	2.91118e-14	4.13814e-12	3.1943e-11	4.26316e-11	3.67905e-12	2.23714e-14	4.03922e-14	4.474e-10	3.07955e-12	4.38953e-11	8.45781e-23	4.91075e-09	0.826767	4.19025e-10	8.13034e-06	0.00078609
PM05	5.08291e-08	5.80895e-05	0.935399	0.189703	1	0.000444534	0.935399	0.935399	0.935399	3.21785e-10	4.93546e-06	5.16862e-06	0.935399	4.67565e-08	6.64286e-07	2.94723e-07	3.16932e-12	0.00078609	1	4.21203e-09	5.18276e-10	0.935399	0.747391	1	0.935399	7.59655e-07	5.67377e-06	0.935399	4.98743e-08	3.1943e-11	3.4219e-14	4.63202e-09	2.61766e-19	2.91118e-14	4.13814e-12	3.1943e-11	4.26316e-11	3.67905e-12	2.23714e-14	4.03922e-14	4.474e-10	3.07955e-12	4.38953e-11	8.45781e-23	4.91075e-09	0.826767	4.19025e-10	8.13034e-06	0.00078609
T09	0.307827	0.351796	7.53961e-06	1.52906e-06	8.06031e-06	3.58309e-09	7.53961e-06	7.53961e-06	7.53961e-06	0.194876	3.97813e-11	0.313017	7.53961e-06	0.283162	0.310223	2.37556e-12	0.191938	0.476065	8.06031e-06	0.255085	0.627289	7.53961e-06	6.02421e-06	8.06031e-06	7.53961e-06	0.354761	0.34361	7.53961e-06	0.302044	0.19345	0.454668	0.28052	0.374602	0.385253	0.549834	0.19345	0.258182	0.47874	0.252797	0.53669	0.594459	0.186501	0.548007	0.0394982	0.2974	6.664e-06	0.55452	0.647471	0.476065
T49	5.08291e-08	5.80895e-05	0.935399	0.189703	1	0.000444534	0.935399	0.935399	0.935399	3.21785e-10	4.93546e-06	5.16862e-06	0.935399	4.67565e-08	6.64286e-07	2.94723e-07	3.16932e-12	0.00078609	1	4.21203e-09	5.18276e-10	0.935399	0.747391	1	0.935399	7.59655e-07	5.67377e-06	0.935399	4.98743e-08	3.1943e-11	3.4219e-14	4.63202e-09	2.61766e-19	2.91118e-14	4.13814e-12	3.1943e-11	4.26316e-11	3.67905e-12	2.23714e-14	4.03922e-14	4.474e-10	3.07955e-12	4.38953e-11	8.45781e-23	4.91075e-09	0.826767	4.19025e-10	8.13034e-06	0.00078609
PW17	5.08291e-08	5.80895e-05	0.935399	0.189703	1	0.000444534	0.935399	0.935399	0.935399	3.21785e-10	4.93546e-06	5.16862e-06	0.935399	4.67565e-08	6.64286e-07	2.94723e-07	3.16932e-12	0.00078609	1	4.21203e-09	5.18276e-10	0.935399	0.747391	1	0.935399	7.59655e-07	5.67377e-06	0.935399	4.98743e-08	3.1943e-11	3.4219e-14	4.63202e-09	2.61766e-19	2.91118e-14	4.13814e-12	3.1943e-11	4.26316e-11	3.67905e-12	2.23714e-14	4.03922e-14	4.474e-10	3.07955e-12	4.38953e-11	8.45781e-23	4.91075e-09	0.826767	4.19025e-10	8.13034e-06	0.00078609
R22B	5.08291e-08	5.80895e-05	0.935399	0.189703	1	0.000444534	0.935399	0.935399	0.935399	3.21785e-10	4.93546e-06	5.16862e-06	0.935399	4.67565e-08	6.64286e-07	2.94723e-07	3.16932e-12	0.00078609	1	4.21203e-09	5.18276e-10	0.935399	0.747391	1	0.935399	7.59655e-07	5.67377e-06	0.935399	4.98743e-08	3.1943e-11	3.4219e-14	4.63202e-09	2.61766e-19	2.91118e-14	4.13814e-12	3.1943e-11	4.26316e-11	3.67905e-12	2.23714e-14	4.03922e-14	4.474e-10	3.07955e-12	4.38953e-11	8.45781e-23	4.91075e-09	0.826767	4.19025e-10	8.13034e-06	0.00078609
T123	5.08291e-08	5.80895e-05	0.935399	0.189703	1	0.000444534	0.935399	0.935399	0.935399	3.21785e-10	4.93546e-06	5.16862e-06	0.935399	4.67565e-08	6.64286e-07	2.94723e-07	3.16932e-12	0.00078609	1	4.21203e-09	5.18276e-10	0.935399	0.747391	1	0.935399	7.59655e-07	5.67377e-06	0.935399	4.98743e-08	3.1943e-11	3.4219e-14	4.63202e-09	2.61766e-19	2.91118e-14	4.13814e-12	3.1943e-11	4.26316e-11	3.67905e-12	2.23714e-14	4.03922e-14	4.474e-10	3.07955e-12	4.38953e-11	8.45781e-23	4.91075e-09	0.826767	4.19025e-10	8.13034e-06	0.00078609
T7	5.08291e-08	5.80895e-05	0.935399	0.189703	1	0.000444534	0.935399	0.935399	0.935399	3.21785e-10	4.93546e-06	5.16862e-06	0.935399	4.67565e-08	6.64286e-07	2.94723e-07	3.16932e-12	0.00078609	1	4.21203e-09	5.18276e-10	0.935399	0.747391	1	0.935399	7.59655e-07	5.67377e-06	0.935399	4.98743e-08	3.1943e-11	3.4219e-14	4.63202e-09	2.61766e-19	2.91118e-14	4.13814e-12	3.1943e-11	4.26316e-11	3.67905e-12	2.23714e-14	4.03922e-14	4.474e-10	3.07955e-12	4.38953e-11	8.45781e-23	4.91075e-09	0.826767	4.19025e-10	8.13034e-06	0.00078609
T24B	5.08291e-08	5.80895e-05	0.935399	0.189703	1	0.000444534	0.935399	0.935399	0.935399	3.21785e-10	4.93546e-06	5.16862e-06	0.935399	4.67565e-08	6.64286e-07	2.94723e-07	3.16932e-12	0.00078609	1	4.21203e-09	5.18276e-10	0.935399	0.747391	1	0.935399	7.59655e-07	5.67377e-06	0.935399	4.98743e-08	3.1943e-11	3.4219e-14	4.63202e-09	2.61766e-19	2.91118e-14	4.13814e-12	3.1943e-11	4.26316e-11	3.67905e-12	2.23714e-14	4.03922e-14	4.474e-10	3.07955e-12	4.38953e-11	8.45781e-23	4.91075e-09	0.826767	4.19025e-10	8.13034e-06	0.00078609
T150	5.08291e-08	5.80895e-05	0.935399	0.189703	1	0.000444534	0.935399	0.935399	0.935399	3.21785e-10	4.93546e-06	5.16862e-06	0.935399	4.67565e-08	6.64286e-07	2.94723e-07	3.16932e-12	0.00078609	1	4.21203e-09	5.18276e-10	0.935399	0.747391	1	0.935399	7.59655e-07	5.67377e-06	0.935399	4.98743e-08	3.1943e-11	3.4219e-14	4.63202e-09	2.61766e-19	2.91118e-14	4.13814e-12	3.1943e-11	4.26316e-11	3.67905e-12	2.23714e-14	4.03922e-14	4.474e-10	3.07955e-12	4.38953e-11	8.45781e-23	4.91075e-09	0.826767	4.19025e-10	8.13034e-06	0.00078609
T56	0.612546	0.496273	3.00997e-10	6.10435e-11	3.21785e-10	1.43044e-13	3.00997e-10	3.00997e-10	3.00997e-10	1	0.80746	0.248278	3.00997e-10	0.600245	0.623907	9.48374e-17	0.984921	0.377604	3.21785e-10	0.877284	0.482398	3.00997e-10	2.40499e-10	3.21785e-10	3.00997e-10	0.415314	0.484724	3.00997e-10	0.590661	0.992683	0.824363	0.558209	0.676025	0.951503	0.537379	0.992683	0.547292	0.888511	0.462321	0.524533	0.53649	0.981246	0.526362	0.04624	0.591798	2.66041e-10	0.480568	0.157365	0.377604
T156	5.08291e-08	5.80895e-05	0.935399	0.189703	1	0.000444534	0.935399	0.935399	0.935399	3.21785e-10	4.93546e-06	5.16862e-06	0.935399	4.67565e-08	6.64286e-07	2.94723e-07	3.16932e-12	0.00078609	1	4.21203e-09	5.18276e-10	0.935399	0.747391	1	0.935399	7.59655e-07	5.67377e-06	0.935399	4.98743e-08	3.1943e-11	3.4219e-14	4.63202e-09	2.61766e-19	2.91118e-14	4.13814e-12	3.1943e-11	4.26316e-11	3.67905e-12	2.23714e-14	4.03922e-14	4.474e-10	3.07955e-12	4.38953e-11	8.45781e-23	4.91075e-09	0.826767	4.19025e-10	8.13034e-06	0.00078609
T25A	0.778776	1	5.43369e-05	1.10198e-05	5.80895e-05	2.58228e-08	5.43369e-05	5.43369e-05	5.43369e-05	0.496273	0.249208	0.442976	5.43369e-05	0.804904	0.800303	1.71203e-11	0.488789	0.673717	5.80895e-05	0.552388	0.731262	5.43369e-05	4.34156e-05	5.80895e-05	5.43369e-05	0.570009	0.976729	5.43369e-05	0.858577	0.492642	0.598235	0.709693	0.491281	0.546368	0.723452	0.492642	0.733896	0.563684	0.285703	0.706157	0.782168	0.53325	0.767401	0.0634633	0.752398	4.80265e-05	0.786422	0.275864	0.673717
PW09	5.08291e-08	5.80895e-05	0.935399	0.189703	1	0.000444534	0.935399	0.935399	0.935399	3.21785e-10	4.93546e-06	5.16862e-06	0.935399	4.67565e-08	6.64286e-07	2.94723e-07	3.16932e-12	0.00078609	1	4.21203e-09	5.18276e-10	0.935399	0.747391	1	0.935399	7.59655e-07	5.67377e-06	0.935399	4.98743e-08	3.1943e-11	3.4219e-14	4.63202e-09	2.61766e-19	2.91118e-14	4.13814e-12	3.1943e-11	4.26316e-11	3.67905e-12	2.23714e-14	4.03922e-14	4.474e-10	3.07955e-12	4.38953e-11	8.45781e-23	4.91075e-09	0.826767	4.19025e-10	8.13034e-06	0.00078609
T04	5.08291e-08	5.80895e-05	0.935399	0.189703	1	0.000444534	0.935399	0.935399	0.935399	3.21785e-10	4.93546e-06	5.16862e-06	0.935399	4.67565e-08	6.64286e-07	2.94723e-07	3.16932e-12	0.00078609	1	4.21203e-09	5.18276e-10	0.935399	0.747391	1	0.935399	7.59655e-07	5.67377e-06	0.935399	4.98743e-08	3.1943e-11	3.4219e-14	4.63202e-09	2.61766e-19	2.91118e-14	4.13814e-12	3.1943e-11	4.26316e-11	3.67905e-12	2.23714e-14	4.03922e-14	4.474e-10	3.07955e-12	4.38953e-11	8.45781e-23	4.91075e-09	0.826767	4.19025e-10	8.13034e-06	0.00078609
PM06	5.08291e-08	5.80895e-05	0.935399	0.189703	1	0.000444534	0.935399	0.935399	0.935399	3.21785e-10	4.93546e-06	5.16862e-06	0.935399	4.67565e-08	6.64286e-07	2.94723e-07	3.16932e-12	0.00078609	1	4.21203e-09	5.18276e-10	0.935399	0.747391	1	0.935399	7.59655e-07	5.67377e-06	0.935399	4.98743e-08	3.1943e-11	3.4219e-14	4.63202e-09	2.61766e-19	2.91118e-14	4.13814e-12	3.1943e-11	4.26316e-11	3.67905e-12	2.23714e-14	4.03922e-14	4.474e-10	3.07955e-12	4.38953e-11	8.45781e-23	4.91075e-09	0.826767	4.19025e-10	8.13034e-06	0.00078609
PW03	0.617378	0.705565	0.00770067	0.00156173	0.00823249	3.65963e-06	0.00770067	0.00770067	0.00770067	0.395453	0.0353424	0.627789	0.00770067	0.567912	0.622389	2.42631e-09	0.38949	0.954804	0.00823249	0.5116	0.604265	0.00770067	0.00615289	0.00823249	0.00770067	0.711744	0.689146	0.00770067	0.605782	0.39256	0.41563	0.562613	0.36563	0.406628	0.502625	0.39256	0.517811	0.446863	0.260831	0.49061	0.543419	0.378458	0.53316	0.0792437	0.596468	0.00680636	0.585286	0.236714	0.954804
T16B	5.08291e-08	5.80895e-05	0.935399	0.189703	1	0.000444534	0.935399	0.935399	0.935399	3.21785e-10	4.93546e-06	5.16862e-06	0.935399	4.67565e-08	6.64286e-07	2.94723e-07	3.16932e-12	0.00078609	1	4.21203e-09	5.18276e-10	0.935399	0.747391	1	0.935399	7.59655e-07	5.67377e-06	0.935399	4.98743e-08	3.1943e-11	3.4219e-14	4.63202e-09	2.61766e-19	2.91118e-14	4.13814e-12	3.1943e-11	4.26316e-11	3.67905e-12	2.23714e-14	4.03922e-14	4.474e-10	3.07955e-12	4.38953e-11	8.45781e-23	4.91075e-09	0.826767	4.19025e-10	8.13034e-06	0.00078609
T110	5.08291e-08	5.80895e-05	0.935399	0.189703	1	0.000444534	0.935399	0.935399	0.935399	3.21785e-10	4.93546e-06	5.16862e-06	0.935399	4.67565e-08	6.64286e-07	2.94723e-07	3.16932e-12	0.00078609	1	4.21203e-09	5.18276e-10	0.935399	0.747391	1	0.935399	7.59655e-07	5.67377e-06	0.935399	4.98743e-08	3.1943e-11	3.4219e-14	4.63202e-09	2.61766e-19	2.91118e-14	4.13814e-12	3.1943e-11	4.26316e-11	3.67905e-12	2.23714e-14	4.03922e-14	4.474e-10	3.07955e-12	4.38953e-11	8.45781e-23	4.91075e-09	0.826767	4.19025e-10	8.13034e-06	0.00078609
T140	5.08291e-08	5.80895e-05	0.935399	0.189703	1	0.000444534	0.935399	0.935399	0.935399	3.21785e-10	4.93546e-06	5.16862e-06	0.935399	4.67565e-08	6.64286e-07	2.94723e-07	3.16932e-12	0.00078609	1	4.21203e-09	5.18276e-10	0.935399	0.747391	1	0.935399	7.59655e-07	5.67377e-06	0.935399	4.98743e-08	3.1943e-11	3.4219e-14	4.63202e-09	2.61766e-19	2.91118e-14	4.13814e-12	3.1943e-11	4.26316e-11	3.67905e-12	2.23714e-14	4.03922e-14	4.474e-10	3.07955e-12	4.38953e-11	8.45781e-23	4.91075e-09	0.826767	4.19025e-10	8.13034e-06	0.00078609
[truncated: 22 more columns]
